1 **Looking for the mechanism of arsenate respiration in an arsenate-dependent growing**  
2 **culture of *Fusibacter* sp. strain 3D3, independent of ArrAB**

3

4 **Acosta Grinok Mauricio<sup>1</sup>, Susana Vázquez<sup>2,3</sup>, Guiliani Nicolás<sup>4</sup>, Sabrina Marín<sup>1</sup>, Demergasso**  
5 **Cecilia<sup>1,5</sup>**

6 <sup>1</sup>Biotechnology Center, Universidad Católica del Norte, Antofagasta, Chile

7 <sup>2</sup>Cátedra de Biotecnología, Facultad de Farmacia y Bioquímica, Universidad de Buenos Aires, Buenos  
8 Aires, Argentina

9 <sup>3</sup>Instituto de Nanobiotecnología (NANOBIOTEC), Universidad de Buenos Aires (UBA) - Consejo  
10 Nacional de Investigaciones Científicas y Técnicas (CONICET), Buenos Aires, Argentina

11 <sup>4</sup>Departamento de Biología, Facultad de Ciencias, Universidad de Chile, Chile

12 <sup>5</sup>Nucleus for the study of cancer at a basic, applied, and clinical level, Universidad Católica del Norte,  
13 Antofagasta, Chile

14

15

16 **Abstract**

17 The literature has reported the isolation of arsenate-dependent growing (ADG) microorganisms which lack  
18 a canonical homolog for respiratory arsenate reductase, ArrAB. We recently isolated an ADG bacterium  
19 from arsenic-bearing environments in Northern Chile, *Fusibacter* sp. strain 3D3 (*Fas*) and studied the  
20 arsenic metabolism in this Gram-positive isolate. Features of *Fas* deduced from genome analysis and  
21 comparative analysis with other arsenic-reducing microorganisms revealed the lack of ArrAB coding genes  
22 and the occurrence of two *arsC* genes encoding for putative cytoplasmic arsenate reductases named ArsC-  
23 1 and ArsC-2. Interestingly, ArsC-1 and ArsC-2 belong to the thioredoxin-coupled family (because of the  
24 redox-active disulfide protein used as reductant), but they conferred differential AsV resistance to the *E.*  
25 *coli* WC3110  $\Delta$ *arsC* strain. PCR experiments confirmed the absence of *arrAB* genes and results obtained  
26 using uncouplers revealed that *Fas* growth is linked to the proton gradient. In addition, *Fas* harbors  
27 ferredoxin-NAD<sup>+</sup> oxidoreductase (Rnf) coding genes. These are key molecular markers of a recently  
28 discovered flavin-based electron bifurcation mechanism involved in energy conservation, mainly in  
29 anaerobic metabolisms regulated by the cellular redox state and mostly associated with cytoplasmic enzyme  
30 complexes. At least three electron-bifurcating flavoenzyme complexes were evidenced in *Fas*, some of  
31 them shared in conserved genomic regions by other members of the *Fusibacter* genus. These physiological  
32 and genomic findings permit us to hypothesize the existence of an uncharacterized arsenate-dependent  
33 growth metabolism regulated by the cellular redox state in *Fusibacter* genus.

## 34 **Introduction**

### 35 ***The arsenic bioenergetic metabolisms***

36 Until the 90's, arsenic (As) was recognized only as a toxic compound for cells due to its role as a  
37 molecular analogous to phosphate, able to inhibit ATP synthesis, inactivate proteins and affect various  
38 intracellular processes. The new knowledge about the role of arsenic as a reactant in the bioenergetic  
39 microbial metabolisms has been summarized in 2014 by Amend et al. [1]. Anaerobic arsenic respiration  
40 using organic matter as electron donor [2, 3], energy conservation from bacterial arsenite oxidation [4, 5]  
41 and the use of arsenite as a fuel for anoxygenic photosynthesis complement the description of the  
42 microbially-catalyzed arsenic metabolisms [6, 7].

43 The pathways involving As metabolizing enzymes contribute to the generation of chemiosmotic  
44 potential by coupling exergonic electron transfer to proton translocation with As playing the role of  
45 oxidizing (arsenate reductase, Arr) or reducing (arsenite oxidase Aio, or the alternative arsenite oxidase  
46 Arx, a variant of Arr but working in reverse) substrates [1]. Arr operates by funneling reducing equivalents  
47 from organic matter to the terminal acceptor AsV in an anaerobic respiration involving the quinol pool .  
48 According to the possible metabolic pathways, Aio transfers electrons from AsIII towards O<sub>2</sub>, NO<sup>-</sup>, chlorate  
49 or the photosynthetic reaction center through a chain of electron carriers: Cyt and Cox, Fdh-Nar-Nir-Nor-  
50 NosZ, soluble cytochrome and cytochrome-chlorate oxide-reductase (Clr) or the membrane-bound  
51 auracyanin, respectively. In 2013, van Lis et al. (2013) stipulated that all the Arr-harboring strains oxidize  
52 the liposoluble menaquinone (MK) pool via an AsV reduction process whereas the Arx-harboring strains  
53 reduce the ubiquinone (UQ) pool via an AsIII oxidation process [8]. MK and UQ biosynthetic pathways  
54 were clearly identified in Arr and Arx-harboring strains, respectively. Besides that, it has been reported that  
55 some AsV reducing microorganisms, such as *Shewanella* sp. strain HN-41, *Desulfomicrobium* sp. strain  
56 Ben-RB, *Citrobacter* sp. strain TSA-1, *Fusibacter* sp. strain 3D3 and *Pyrobaculum aerophilum* strain IM2  
57 do not contain *arrAB* genes [1, 9-14], indicating that there should be at least one alternative and  
58 uncharacterized pathway for arsenic reduction.

59

### 60 ***The arsenic resistance mechanism***

61 Many bacteria can detoxify As by the plasmid or chromosomal encoded Ars system, which is  
62 widespread in nature and has been extensively studied [15, 16]. The arsenical resistance (*ars*) operon  
63 includes up to five genes, among which *arsR*, a transcriptional regulator encoding gene, )and the *arsC* gene  
64 are almost always present [17]. The key enzyme is ArsC, a cytoplasmic arsenate reductase reducing AsV  
65 to AsIII, which is then extruded out of the cell by the pump coded by the *arsB* gene. Three different ArsC  
66 prokaryotic families have been defined based on their protein structures, reduction mechanisms and location  
67 of the catalytic cysteine residues [18]: i) the glutathione (GSH)/glutaredoxin (Grx)-coupled class (plasmid  
68 R773 from Gram-negative bacteria *Escherichia coli*) [19]; ii) the thioredoxin (Trx)/thioredoxin reductase  
69 (TrxR)-dependent class (plasmid pl258 from Gram-positive bacteria *Staphylococcus aureus*) [20]; iii) the  
70 mycothiol (MSH)/mycoredoxin (Mrx)-dependent class (chromosome of Gram-positive *Actinobacteria* spp)  
71 where MSH is the major thiol [21]. Kinetics data of arsenate reduction have shown a higher catalytic

72 efficiency in Trx- than in Grx-linked arsenate reductases. In some cases, the efflux of AsIII can also be  
73 coupled to the electrochemical proton gradient, where chemical energy in the form of ATP is used to pump  
74 AsIII with the help of the ATPase ArsA [22-25].

75 Both, the number and type (Trx or Grx clade) of *arsC* genes present in the genomes of prokaryotic  
76 organisms have been shown to impact their As resistance levels [18, 26-28]. The Trx reducing system has  
77 been reported to be the most efficient system exploited by arsenate reductases [18]. Besides, arsenate  
78 reductases with the same structural fold but depending on two different thiol-disulfide relay mechanisms  
79 (Trx and GSH) have also been observed in a single microorganism, *Corynebacterium glutamicum* ATCC  
80 13032 [18]. In that case, a different role has been proposed for both enzymes, representatives of different  
81 ArsC prokaryotic families: the Trx-dependent would reduce arsenate to regulate the gene expression of the  
82 other one, that is involved in the resistance against As [18]. A predominance of Trx-linked ArsC have been  
83 found in low G+C Gram-positive bacteria [29], which is the predominant group of bacteria in the As-  
84 impacted environments of Northern Chile [30-32].

85

### 86 ***Another energy conservation mode: “A new era for electron bifurcation”***

87 In 2008, a third type of energy conservation mode [33] in addition to substrate-level phosphorylation  
88 (SLP) and electron transport phosphorylation (ETP) has been discovered, almost exclusively associated  
89 with anaerobic metabolism. This type of energy conservation is based on two main components: i) the  
90 flavin-based electron bifurcation (FBEB), where ferredoxins and flavodoxins act as low-potential terminal  
91 acceptors, and ii) the ETP with protons (ferredoxin-proton reductase, Ech) or NAD<sup>+</sup> (ferredoxin-NAD<sup>+</sup>  
92 reductase, Rnf) as electron acceptors, where ferredoxins and flavodoxins re-oxidation drive electrochemical  
93 H<sup>+</sup> and Na<sup>+</sup> pumps. This energy conservation system has allowed closing gaps between the free energy  
94 change and the number of ATP molecules synthesized (ATP/ $\Delta$ G) in the energy metabolism of some  
95 anaerobes [34, 35].

96 In many acetogens, acetoclastic methanogens, sulfate reducers and other strict anaerobes [36-39], the  
97 Rnf complex catalyzes the reversible oxidation of reduced ferredoxin with NAD<sup>+</sup>, coupling this exergonic  
98 reaction with the build-up of an electrochemical proton or sodium ion potential [34]. In different species, it  
99 has been demonstrated that the Rnf complex can be associated to the generation of either a Na<sup>+</sup> gradient  
100 [40] or of a H<sup>+</sup> gradient [41]. The stoichiometry is most likely one sodium ion or proton translocated per  
101 electron [39]. Consistent with the finding of a Na<sup>+</sup>-dependent Rnf complex, a conserved Na<sup>+</sup>-binding motif  
102 in the ATP synthase has been reported [42] and when a H<sup>+</sup>-dependent Rnf complex was found, a conserved  
103 H<sup>+</sup>-binding motif in the ATP synthase was reported instead [43]. The Rnf complex was first discovered in  
104 *Rhodobacter capsulatus* [44] and has a high sequence similarity with the Na<sup>+</sup>-translocating  
105 NADH:quinone-oxidoreductase (Nqr) [44, 45]. Some genomic, transcriptomic and proteomic reports have  
106 described the subunits conforming the RnfAG-complex, which are variable in number and organization  
107 depending on the species, as well as their main role in the generation of membrane electrochemical  
108 gradients and, therefore, in energy conservation [36, 46, 47]. Briefly, each subunit of the Rnf complex has  
109 a specific function related to cytosolic ferredoxin oxidation (RnfB), proton/sodium membrane translocation

110 (RnfGD) or NAD<sup>+</sup> cytosolic reduction (RnfC) as has been described in several microorganisms such as  
111 *Acetobacterium woodii*, *Escherichia coli*, *Clostridium tetani*, *Methanosarcina acetivorans*, and  
112 *Desulfovibrio alaskensis*, among others [48, 49].

113 In the same way, up to twelve multienzyme complexes involved in the electron bifurcation (referred to  
114 as electron confurcation when operating in reverse) mechanism and associated to energy conservation have  
115 been reported according to the 2018 and 2019 reviews on the subject [39, 50-53]. All known electron  
116 bifurcating enzymes contain at least one flavin cofactor (FAD or FMN), and it is why the novel mechanism  
117 was defined as a FBEB mechanism [53]. Interestingly, the distribution studies of the identified FBEB  
118 enzymes have shown that they are predominantly present among members of the *Firmicutes* and contribute  
119 to diverse metabolic pathways [52, 53]. A key role in balancing the ratio of oxidized to reduced NAD(H)  
120 and ferredoxin (Fd) pools has been proposed for the FBEB mechanism and its presence in arsenate reducers  
121 has also been identified (e.g., *Alkaliphilus oremlandii* OhILAs) [52].

122 Functional confirmation of energy conservation by the Rnf-mediated electron transport chain has been  
123 recently reported [41]. The *rnfAB*-mutants of the anaerobe *Clostridium ljungdahlii* were unable to grow on  
124 H<sub>2</sub>/CO<sub>2</sub>, demonstrating the important role of the Rnf complex in pumping H<sup>+</sup> out of the cell membrane for  
125 energy conservation during autotrophic growth. ATP synthesis was also significantly reduced in the *rnfAB*-  
126 mutants during heterotrophic growth on fructose. Moreover, in the acetogenic *Acetobacterium woodii*, the  
127 sequence of events reported to be compatible with the caffeate reduction coupled to ATP synthesis [40] is:  
128 caffeate reduction → generation of a transmembrane Na<sup>+</sup> gradient → generation of ATP by the Na<sup>+</sup> F<sub>0</sub>F<sub>1</sub>  
129 ATP synthase. The role of the Rnf complex in the Na<sup>+</sup>-dependent electron transfer reaction from reduced  
130 ferredoxin to NAD<sup>+</sup> and vice versa was confirmed at the functional level in *A. woodii* by means of the  
131 protein and enzymatic activity assays and by genetic evidence [46, 54]. Another functional confirmation  
132 was reported in the sulfate reducer *Desulfovibrio alaskensis*, where *rnfA* and *rnfD* null-mutants were unable  
133 to grow on H<sub>2</sub>, formate and ethanol [55], as reported in other studies [41, 56]. Moreover, an increased  
134 expression level of *rnf* genes was observed in *D. alaskensis* growing with H<sub>2</sub> and sulfate compared to lactate  
135 and sulfate. Some authors have inferred that *D. alaskensis* likely relies extensively on ferredoxin oxidation  
136 by the Rnf complex to produce a H<sup>+</sup> gradient during growth on substrates that do not yield ATP by SLP  
137 [55, 56]. However, for those substrates that do yield ATP by SLP such as malate, fumarate, pyruvate and  
138 lactate, a decreased growth rate and/or yield was also observed in most cases for the *rnf* mutants [55].  
139 Finally, it has been reported that the lactate dehydrogenase-electron transferring flavoprotein complex, the  
140 ferredoxin and the Rnf complex are key components in the lactate metabolism of *A. woodii*, a strictly  
141 anaerobic bacteria [57].

142 Altogether, these data pointed out that the Rnf complex is pivotal for anaerobic growth in  
143 microorganisms without cytochromes, quinones or other membrane-soluble electron carriers. However, it  
144 has also been proposed that metals like molybdenum, transition metal ions with three readily accessible  
145 oxidation states under *in vivo* conditions, could also be the site of electron bifurcation, of which the  
146 molybdenum in the arsenite oxidases could be one example [50].

147

## 148 ***Arsenate respiration independent of ArrAB***

149 The absence of a homolog for the respiratory arsenate reductase gene, *arrAB*, has been reported for  
150 other strains. In one of them, *Pyrobaculum aerophilum*, a high expression of a gene cluster encoding for a  
151 molybdopterin oxidoreductase (PAE1265) with a molybdopterin-binding subunit was observed in cultures  
152 induced with arsenate. The analysis of the predicted product of PAE1265 showed the occurrence of an  
153 active site domain conserved in bacterial tetrathionate reductases and arsenate reductases [12, 58], leading  
154 to the hypothesis that tetrathionate reductases may represent a novel type of respiratory arsenate reductases.  
155 Based on this hypothesis, Blum and collaborators [10] performed a transcriptomic analysis focused on the  
156 tetrathionate reductase (*ttrA*), *arsC*, and 16S rRNA genes from *Citrobacter* TSA grown on arsenate. They  
157 reported that only *arsC* mRNA was strongly expressed, while there was a little detectable upregulation for  
158 *ttrA*, proposed to be the mean to achieve dissimilatory arsenate reduction. After those experimental results,  
159 they hypothesized that “*it is possible that there is an electron flow linkage to the detoxifying ArsC protein*  
160 *servicing in a unique respiratory capacity and presumably located in the membrane region rather than the*  
161 *cytoplasm*”. Interestingly, similar gaps in the energy metabolism of anaerobes [34, 35] were closed by the  
162 characterization of the energy conservation system depending on a FBEB ferredoxin reduction and on a  
163 proton/sodium translocating ferredoxin oxidation [38]. This is considered as a third type of energy  
164 conservation mode [34] in addition to SLP and ETP.

165

## 166 ***Fusibacter* sp. strain 3D3 as a case study**

167 Our research group has confirmed the occurrence of an active As biogeochemical cycle in Salar de  
168 Ascotán from metagenomic analysis [32]. Prokaryotic populations compatible with microorganisms able  
169 to transform As for energy conservation to produce H<sub>2</sub>, H<sub>2</sub>S and acetic acid (potential electron sources for  
170 As reduction) and tolerate high levels of As by means of specific stress response are involved in this cycle.  
171 Furthermore, the characterization of enrichment cultures confirmed their ability to metabolize As [32],  
172 some of its components being members of genera that, like *Fusibacter*, had not been previously reported  
173 as As metabolizing microorganisms [13, 59]. There is no report of arsenic resistance in other isolates of the  
174 *Fusibacter* genus, however, microorganisms closely related to this genus have been reported to occur in  
175 contaminated groundwater in Bangladesh [60]. The genome sequence of *Fas* [13] had suggested the  
176 presence of an *arsC* gene.

177 Then, the aim of this work was to describe the role of the cytoplasmic arsenate reductase (ArsC) and  
178 the membrane-associated ion-translocating complex (Rnf) in the energy metabolism of *Fusibacter* sp. strain  
179 3D3, as a representative of arsenate reducing microorganisms independent of ArrAB.

180

## 181 **Materials and methods**

182

183 **Bacterial strains.** *Fusibacter* sp. strain 3D3 was isolated at the Centro de Biotecnología, Universidad  
184 Católica del Norte, Antofagasta, Chile, from samples collected in the hypersaline sediments of the Salar de  
185 Ascotán in Northern Chile and deposited in the American Type Culture Collection as *Fusibacter ascotense*

186 ATCC BAA-2418 (hereinafter referred to as *Fas*). The necessary tests and deposits to describe the isolate  
187 as a new species are running, and “*Fusibacter ascotence*” is the proposed name. The *Fas* genome assembly  
188 [13] is available on NCBI (RefSeq GCF\_001748365.1, GenBank GCA\_001748365.1). The *E. coli*  
189 WC3110  $\Delta arsC$  strain was generously given by Dr. Barry P. Rosen.

190  
191 **Culture characterization.** All growth experiments were performed in duplicate in serum bottles containin  
192 g 20 mL liquid Newman-modified minimal medium with lactate (10 mM), sulfate (20 mM), arsenate (2 m  
193 M), yeast extract (0.1%), NaCl (10 g L<sup>-1</sup>), and cysteine (1 mM), inoculated with 1x10<sup>6</sup> cells mL<sup>-1</sup> from a fr  
194 esh culture and incubated at 30 °C in an anaerobic chamber under N<sub>2</sub>:CO<sub>2</sub>:H<sub>2</sub> gas atmosphere (80:15:5, v/v)  
195 for 5 to 10 days in the dark, unless otherwise stated. An abiotic control was carried out in sterile medium  
196 without inoculum. Cell growth was monitored by microscope cell counting using a Neubauer improved ch  
197 amber (0.01 mm x 0.0025 mm<sup>2</sup>, Marienfeld). To test for growth in the presence of oxygen, aerobic culture  
198 s were performed in shaking flasks incubated at 100 rpm in a rotatory shaker. The range of temperature fo  
199 r growth was tested between 15 °C and 37 °C, and the range of pH between 4 and 9. To assess the ferment  
200 ative metabolism, *Fas* was grown with alternative substrates: lactate, acetate, citrate, glucose, galactose, g  
201 lycine, or tryptone (10 mM). Sodium thiosulfate (10 mM), sodium sulfate (0 to 10 mM), elemental sulfur (  
202 1%), yeast extract (0.2 %) or cysteine (1 mM) were added to culture media to determine its ability to obtai  
203 n energy from sulfate reduction and to use different sulfur sources. To test for AsV resistance and the opti  
204 mal concentration of As for energy metabolism, a range of concentrations between 0 and 16 mM was assa  
205 yed. To find out if the growth of *Fas* on AsV as electron acceptor was linked to oxidative phosphorylation  
206 and formation of proton or sodium gradients, growth was also evaluated with the addition of the protonop  
207 hore 3,3', 4',5-tetrachlorosalicylanide (TCS, 20 μM) or the sodium-specific ionophore N,N,N',N'-  
208 tetracyclohexyl-1,2-phenylenedioxydiacetamide (ETH2120, 20 μM) [41, 61].

209  
210 **Analytical methods.** To evaluate the arsenic and sulfate reducing activity, As concentrations in the culture  
211 medium from bacterial cultures were measured, after filtering through 0.02 μm pore size, using Hydride  
212 Generation Atomic Absorption Spectroscopy (HG-AAS) and the As speciation, AsIII and AsV, was  
213 analyzed using a Chromatography PSA 10.055 Millennium Excalibur. Lactate, acetate, and sulfate were  
214 quantified by ion chromatography (Dionex) with an IONPAC AS11-HC analytical column (4X250).

215  
216 **Trx and TrxR enzymatic assays.** To evaluate the participation of the Trx system in the early (30 min) and  
217 late (8 h) response to As exposure, the TrxR and Trx activities were measured at 30 °C using whole cell  
218 extracts as described previously [62], and a control without As exposure was also included in the  
219 experiment. TrxR was assayed for reductive activity toward 5,5-dithio-bis-(2-nitrobenzoic acid) (DTNB)  
220 with NADPH to form 5-thio-2-nitrobenzoic acid (TNB), producing a strong yellow color that was measured  
221 at 412 nm [63]. Total Trx activity was determined by the insulin precipitation assay [64]. The standard  
222 assay mixture contained 0.1 M potassium phosphate (pH 7.0), 1 mM EDTA, and 0.13 mM bovine insulin

223 in the absence or in presence of the cellular extract, the reaction was started upon the addition of 1 mM  
224 DTT and the increase of the absorbance at 650 nm was monitored.

225  
226 **DNA purification.** Bacterial DNA was extracted and purified using the High Pure PCR Template  
227 Preparation kit (Roche, cat. n° 11796828001) according to the manufacturer's protocol. PCR products were  
228 purified using the QIAquick PCR Purification kit (QIAGEN, cat. n° 28104), and digested DNA products  
229 were extracted from the agarose gel using the QIAquick Gel Extraction kit (QIAGEN, cat. n° 28704),  
230 according to the manufacturer's instructions.

231  
232 **PCR conditions.** The presence of an *arrA* gene in the *Fas* genome was assessed by a PCR assay performed  
233 using the universal *arrAf* and *arrAr* primers to target an *arrA* internal ~160-200 bp DNA fragment, as  
234 previously described [65]. Genomic DNA from *Shewanella* sp. strain ANA-3 was used as a positive control.  
235 To clone the *Fas* *arsC-1* and *arsC-2* genes, specific primers were designed based on both nucleotide  
236 sequences obtained from *Fas* genome and modified to include *XhoI* and *HindIII* restriction sites (Table S1).  
237 The PCR assays were performed with the Phusion High-Fidelity DNA Polymerase (Thermo Scientific, F-  
238 350S) according to the manufacturer's instructions. The following PCR conditions were used: initial  
239 denaturation at 95 °C for 30 s, followed by 30 cycles of 98 °C for 10 s, 56.1 °C (*arsC-1Fas*) or 60.0 °C  
240 (*arsC-2Fas*) for 25 s, and 56.1 °C (*arsC-1Fas*) or 60.0 °C (*arsC-2Fas*) for 1 min, and a final elongation  
241 at 56.1 or 60 °C for 3 min . Then PCR products were run by electrophoresis and purified from the 1.5%  
242 agarose gel. Screening for recombinant colonies was made by PCR as previously described [66] using the  
243 PCR conditions described above and the GoTag kit (Promega, M3001).

244  
245 **Cloning, heterologous expression of *arsC* genes and evaluation of AsV resistance.** To confirm if *Fas*  
246 *ArsC* confer resistance to AsV, the *arsC-1<sub>Fas</sub>* and *arsC-2<sub>Fas</sub>* genes were amplified as described above. The  
247 purified PCR products were subjected to A-tailing with Taq DNA polymerase and to ligation into a T-  
248 vector (pGEM®-T Easy Vector, Promega, cat. n° A1360). The ligation product was used to transform *E.*  
249 *coli* JM109 (Competent Cells, Promega, cat. n° L2005) and recombinant clones were checked by  
250 sequencing. Plasmids with the *arsC-1<sub>Fas</sub>* and *arsC-2<sub>Fas</sub>* correct sequences were purified by miniprep  
251 (Wizard® Plus SV Minipreps, Promega, cat. n° A1360) and double digested with *XhoI* and *HindIII*  
252 (Thermo Scientific™, cat. n° ER0691 and ER0501, respectively) to release the inserts, which were  
253 subsequently purified and ligated upstream the His-tag into the expression vector pTrcHis2 (Invitrogen™,  
254 cat. n° V36520). The recombinant vectors were transformed into the  $\Delta$ *arsC* *E. coli* WC3110 strain. Positive  
255 clones were cultured in LB medium with ampicillin 50 µg/mL for 12 h at 37 °C. The expression of both  
256 *arsC* genes was induced with IPTG 1 mM and the conferred ability to growth in the presence of 0, 0.5, 1,  
257 1.5, 2.5 and 5 mM AsV was monitored by OD<sub>600</sub> compared to a clone of *E. coli* WC3110 transformed with  
258 the pTrc-*lacZ* used as control. The specific growth rate ( $\mu$ ) was calculated with the equation:  $\mu=(\ln X-$   
259  $\ln X_0)/(t-t_0)$ , where X and X<sub>0</sub> represent the OD<sub>600</sub>, and t and t<sub>0</sub> the time. The doubling time (t<sub>d</sub>) was determined  
260 using the equation:  $t_d=\ln 2/\mu$ .

261  
262 **Bioinformatic analysis.** The genomes of *Fusibacter* sp. strain 3D3 (BDHH00000000.1), *F. ferrireducens*  
263 strain Q10-2<sup>T</sup> (JADKNH00000000.1), *F. paucivorans* strain SEBR 4211<sup>T</sup> (JAHBCL00000000.1), *F.*  
264 *tunisiensis* strain BELH1<sup>T</sup> (JAFBDT00000000.1), *Fusibacter* sp. strain A1 (JABKBY00000000.1) were  
265 obtained from the NCBI database and annotated on the RAST platform using default settings [67].

266 The genome sequence of *Fas* [13] was screened to search for genes encoding components and regulators  
267 of As redox and transport system, as well as those associated with thiol redox systems and energy  
268 metabolisms. Curation of genes of interest was performed by reciprocal analysis against each other and the  
269 sequences available in the public databases to establish similarities and differences regarding gene identity,  
270 structure and function, gene context and control signals [68-72]. The sequence collections available on the  
271 NCBI [73] and the Comprehensive Microbial Resource of the J. Craig Venter Institute (Rockville, MD,  
272 USA) [74] websites facilitated comparative genomic studies with other organisms of interest whose genome  
273 sequencing had already been completed.

274 For the verification of the EtfB (electron transfer flavoprotein subunit beta) domain conservation across  
275 *Fusibacter*, previously known proteins from *Geobacter metallireducens* GS-15, *Thermotoga maritima*  
276 MSB8, *Clostridium ljungdahlii* PETC, *Rhodopseudomonas palustris* BisA53, *Acetobacterium woodii*  
277 WB1, *Clostridium kluyveri* DSM 555, *Acidaminococcus fermentans* VR4, and *Megasphaera elsdenii* T81  
278 were used [75]. The protein sequences were aligned by MUSCLE [76] and visualized by CLC Genomic  
279 Workbench 8.5.1 (Qiagen). Subsequently, using BLAST on the RAST platform, EtfB-type proteins were  
280 searched in *Fusibacter* genomes, and the results were verified by BLASTp in the NCBI database. A similar  
281 procedure was applied to the products of the remaining genes.

282

## 283 **Results**

284

### 285 **Microbial growth**

286 *Fas* grew optimally at temperatures ranging from 20 to 37 °C, with the lower duplication time ( $t_d$ )  
287 observed at 30 °C (Fig. 1A) and under neutral (6-8) pH conditions (Fig. 1B). *Fas* grew in synthetic medium  
288 containing up to 50 g L<sup>-1</sup> of NaCl, and the optimum was 10 g L<sup>-1</sup> [13]. No growth differences were detected  
289 at increasing SO<sub>4</sub><sup>2-</sup> concentrations (Fig. 1C). The highest specific growth rate ( $\mu$ ) was observed at 2 mM of  
290 AsV and pH 7 in anaerobiosis, but it grew in the range of 0.5 to up to 16 mM of AsV (Fig.1D). The lowest  
291 concentration of AsV that completely prevented growth (MIC) of *Fas* was 24 mM. Liquid cultures reached  
292 total bacterial numbers between 3.5x10<sup>7</sup> and 6.5x10<sup>7</sup> cells mL<sup>-1</sup> at the stationary phase (data not shown).

293 Not a significant change was noticed in the doubling time in minimal medium plus arsenate (2 mM) by  
294 the addition of sulfate (0 to 20 mM) (Fig. 1C) [13]. Beside, in minimal medium plus arsenate (2 mM) and  
295 sulfate (20 mM) as electron acceptors *Fas* grew with a doubling time of 0.35 h, which increased to 4 h  
296 when As was not supplemented (Fig. 1D).

297

298



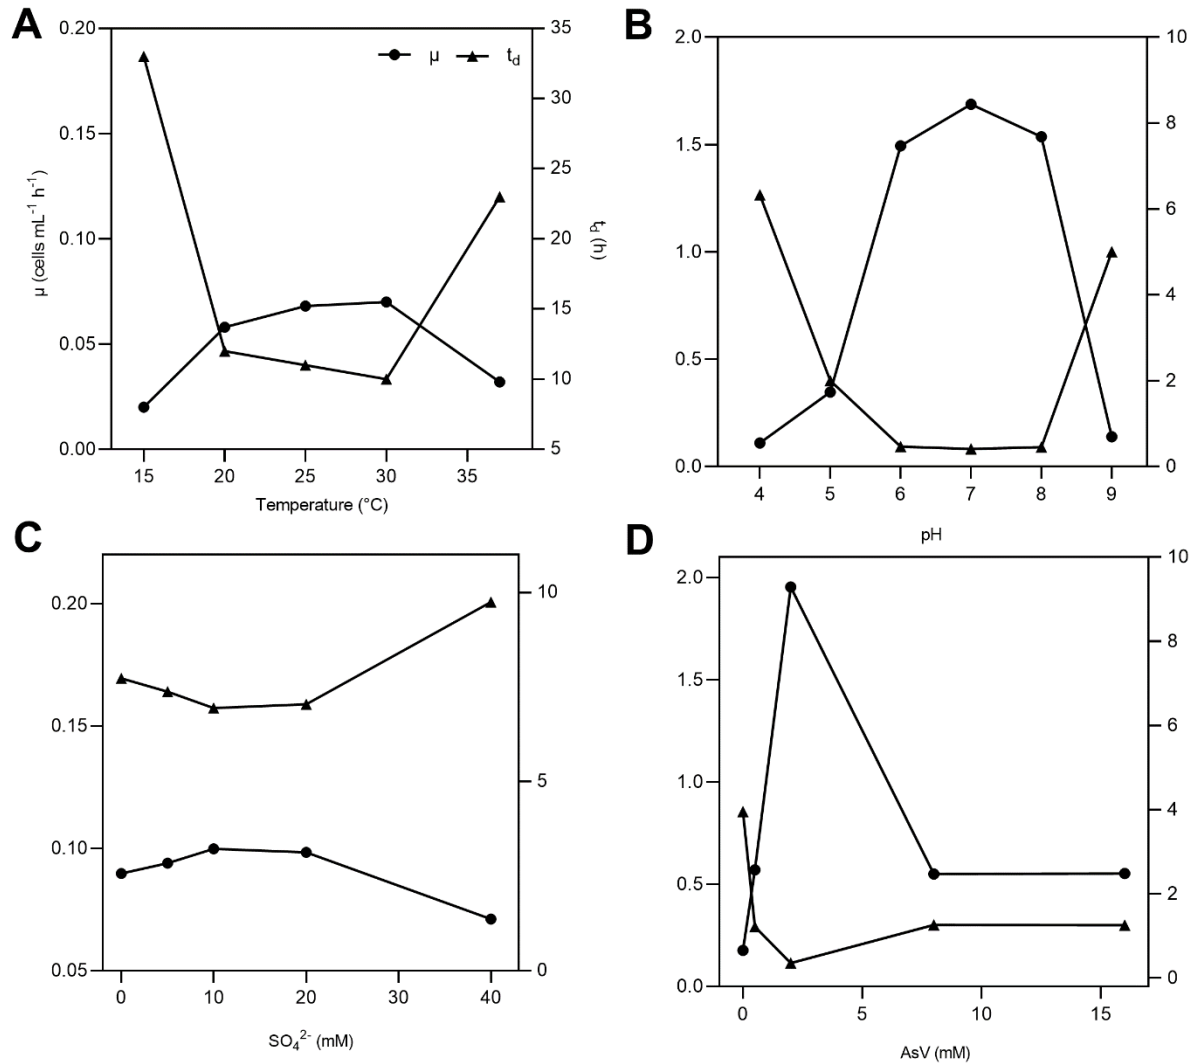

299  
 300 **Figure 1. Growth of *Fas* in arsenate-containing medium.** Duplication time ( $t_d$ ) and specific growth rate  
 301 ( $\mu$ ) of *Fas* growth on increasing temperatures (A), pH (B), concentrations of  $\text{SO}_4^{2-}$  (C) and AsV (D).  
 302 Optimum temperature (30°C), pH (7), and concentrations of As (2 mM) and sulfate (20 mM) were used in  
 303 the experiments except when different values of the corresponding variables were analyzed.

304  
 305 **Features of *Fusibacter* sp. strain 3D3 metabolism**

306 **Substrates and products.** The strain was not able to grow in aerobiosis but grew in anaerobiosis on  
 307 lactate in the presence of sulfate and arsenate as electron acceptors. Defined as a heterotrophic strain, *Fas*  
 308 could use lactate (Fig. 2), glucose and tryptone and required yeast extract to grow (Table 1). Growth without  
 309 the addition of electron acceptors was successful up to the second subculture (data not shown) as it was in  
 310 the previously reported culture medium for *Fusibacter* [77]. Besides, the highest AsV to AsIII reduction  
 311 ratio was evidenced between 72 and 96 hours (Fig. S1).

312

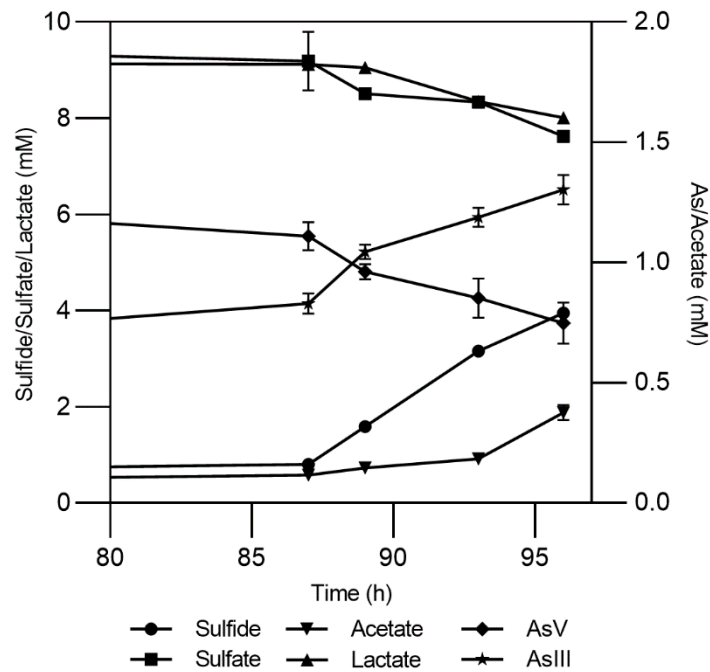

313  
 314 **Figure 2. Growth of *Fas* in Newman-modified minimal medium with lactate (10 mM), sulfate (20**  
 315 **mM), arsenate (2 mM), yeast extract (0.1%), NaCl (10 g L<sup>-1</sup>), and cysteine (1 mM).** Error bars represent  
 316 the standard error of the mean of triplicate cultures. Sterile control experiments were also performed but  
 317 the results were not shown for clarity.

318  
 319 *Fas* can be differentiated from *F. paucivorans*, *F. tunisiensis*, *F. fontis*, *F. bizertensis* and *F.*  
 320 *ferrireducens* by its use of lactate as substrate, of sulfate as electron acceptor, the NaCl concentration for  
 321 growth, its genomic DNA G+C content (Table 1) and its phylogeny [78]. Resistance to As was not reported  
 322 for other isolated members of the genus.

323  
 324 **Table 1. Characteristics that differentiate *Fusibacter* sp. strain 3D3 from other *Fusibacter* species.**

| Characteristics                                         | <i>Fas</i>    | 1       | 2             | 3       | 4       | 5        |
|---------------------------------------------------------|---------------|---------|---------------|---------|---------|----------|
|                                                         | Spindle-      |         | Spindle-      |         |         |          |
| <b>Morphology</b>                                       | shaped<br>rod | Rod     | shaped<br>rod | Rod     | Rod     | Rod      |
| <b>Temperature for growth (°C)</b>                      |               |         |               |         |         |          |
| Range                                                   | 20–35         | 15–40   | 20–45         | 15–45   | 15–35   | 8–45     |
| Optimum                                                 | 30            | 30      | 37            | 30      | 30      | 32       |
| <b>pH for growth</b>                                    |               |         |               |         |         |          |
| Range                                                   | 5.0–9.0       | 5.8–8.4 | 5.7–8.0       | 5.5–8.5 | 5.5–8.2 | 7.0–10.5 |
| Optimum                                                 | 7             | 7       | 7.3           | 7       | 7.2     | 8.5      |
| <b>NaCl concentration for growth (g L<sup>-1</sup>)</b> |               |         |               |         |         |          |
| Range                                                   | 0–50          | 0–100   | 0–100         | 0–35    | 0–50    | 0–60     |
| Optimum                                                 | 2–8           | 30      | 0–30          | 1       | 5       | 30       |

***AsV concentration for growth (mM)***

|         |      |     |     |     |     |     |
|---------|------|-----|-----|-----|-----|-----|
| Range   | 0–16 | n.a | n.a | n.a | n.a | n.a |
| Optimum | 2–8  | n.a | n.a | n.a | n.a | n.a |

***Electron acceptor utilized***

|                  |   |   |   |   |   |   |
|------------------|---|---|---|---|---|---|
| Thiosulfate      | + | + | + | – | + | + |
| Elemental sulfur | + | + | + | + | + | + |
| Sulphate         | + | – | – | – | – | + |

|                                      |      |    |      |      |      |      |
|--------------------------------------|------|----|------|------|------|------|
| <b><i>DNA G+C content (mol%)</i></b> | 37.6 | 43 | 38.2 | 37.6 | 37.4 | 37.4 |
|--------------------------------------|------|----|------|------|------|------|

***Substrates utilized***

|            |     |     |     |     |     |     |
|------------|-----|-----|-----|-----|-----|-----|
| Lactate    | +   | –   | –   | –   | –   | n.a |
| Acetate    | –   | –   | –   | –   | –   | n.a |
| Citrate    | –   | n.a | n.a | n.a | n.a | n.a |
| Glucose    | +   | +   | +   | +   | +   | +   |
| Galactose  | –   | –   | –   | +   | +   | +   |
| Glycine    | –   | n.a | n.a | n.a | n.a | n.a |
| Tryptone   | +   | n.a | n.a | n.a | n.a | n.a |
| Cellobiose | n.a | –   | +   | +   | +   | –   |
| Fructose   | n.a | –   | +   | –   | +   | +   |
| Maltose    | n.a | +   | –   | +   | +   | +   |
| Ribose     | n.a | –   | +   | +   | +   | –   |
| Sucrose    | n.a | +   | –   | +   | +   | +   |
| Trehalose  | n.a | +   | –   | –   | +   | +   |

325 1: *F. paucivorans* strain SEBR 4211<sup>T</sup> [77]; 2: *F. tunisiensis* strain BELH1<sup>T</sup> [79]; 3: *F. fontis* strain  
 326 KhalAKB1<sup>T</sup> [80]; 4: *F. bizertensis* strain LTF Kr01<sup>T</sup> [81], and 5: *F. ferrireducens* strain Q10-2<sup>T</sup> [78]. n.a.:  
 327 not analyzed.

328  
 329 Lactate was consumed (1.11 mM, with 0.26 mM of acetate formed) while arsenate (0.36 mM) and  
 330 sulfate (1.56 mM) were reduced (Fig. 2). The amount of arsenite formed could not be determined  
 331 quantitatively, as it tended to precipitate as yellow arsenic sulfide. On the other hand, sulfate reduction by  
 332 *Fas* was demonstrated by sulfide and arsenic sulfide mineral production (Fig. 2). Interestingly, neither  
 333 sulfate nor thiosulfate reduction was involved in energy conservation as it has been reported for other  
 334 members of the *Fusibacter* genus [77, 79].

335 The ability of *Fas* to use lactate as electron donor when reducing arsenate suggests that arsenate  
 336 respiration supports *its* growth. However, the AsV reduced/lactate oxidized molar ratio observed was  
 337 0.32±0.044 and the acetate produced/lactate consumed ratio was 0.23±0.05 (Fig. 2), when the theoretical  
 338 values predicted for isolated arsenate reduction reactions when lactate is transformed to acetate by respiring  
 339 microorganisms are 2 and 1, respectively [11]. In addition, the concomitant reduction of sulfate and the

340 production of an arsenic sulfide precipitate does not allow an accurate quantification of arsenite and sulfide  
341 during *Fas* growth [13].

342  
343 **Assessment of specific sulfur species source for growth.** The lack of differences in the sodium sulfate  
344 dose curve led us to study the role of sulfur sources in AsV reduction. *Fas* cultures with sodium sulfate,  
345 sodium thiosulfate and elemental sulfur were performed and combined with organic sulfur such as yeast  
346 extract and cysteine, both supplements required in Newman's medium (Fig. S1). Culture without any source  
347 of inorganic sulfur was also carried out. All cultures were performed with 2 mM AsV.

348 The behavior of *Fas* cultures amended with sodium sulfate and sodium thiosulfate did not show  
349 significant differences, reaching the highest level of As reduction with Yeast/Cys complete medium.  
350 Furthermore, the intake of cysteine (empty square) as unique source of organic sulfur appeared to rise up  
351 to 50% of the total AsV reduction in all conditions at 96 hours, and it was especially evident when inorganic  
352 sulfur was absent. Cultures supplemented only with yeast extract (filled triangle) induced lower AsV  
353 reduction ratio than cysteine in all experiments. Growth (cell number) and sulfide production were also  
354 measured (Fig. S1).

355  
356 **Assessment of the role of proton/sodium gradient.** The addition of 20  $\mu\text{M}$  of sodium ion ionophore  
357 ETH2120 did not have a significant influence on the growth of the strain with lactate as the electron donor  
358 whether sulfate-arsenate (Fig. 3A squares) or only arsenate (Fig. 3B squares) were present as electron  
359 acceptors. On the other hand, 20  $\mu\text{M}$  of the protonophore TCS completely inhibited the growth on lactate-  
360 sulfate-arsenate (Fig. 3A triangles) and lactate-arsenate (Fig. 3B triangles). Growth experiments showed  
361 that lactate-sulfate-arsenate and lactate-arsenate were insensitive to the  $\text{Na}^+$  ionophore ETH2120 but were  
362 highly sensitive to the protonophore TCS.

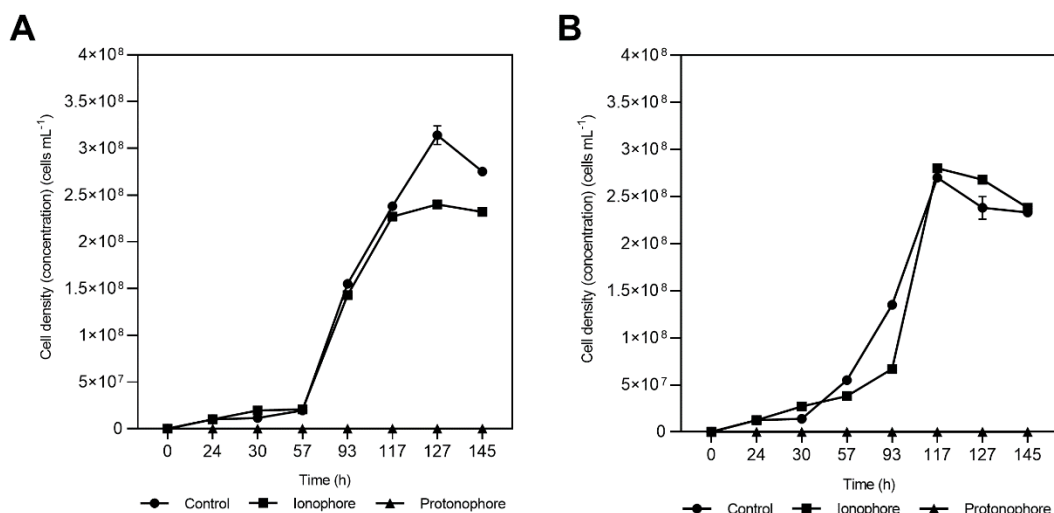

363  
364 **Figure 3. Effects of ETH2120 and TCS on *Fas* growth.** Growth curves with lactate-sulfate-arsenate (A)  
365 and lactate-arsenate (B), with addition of 20  $\mu\text{M}$  ETH2120 as ionophore (■), 20  $\mu\text{M}$  TCS as protonophore  
366 (▲) or no addition (●). Error bars show standard deviation of duplicates.

367

368 In the protonophore test, the resting cells were also decreasing and demonstrated to be highly sensitive  
369 to TCS suggesting that *Fas* needed the proton gradient for energy generation. Moreover, the inability of the  
370 strain to grow in the presence of TCS is consistent with the role of that gradient in the generation of a proton  
371 motive force.

372  
373 **Assessment of the Trx system in the response to As exposure.** To gain insight into the thiol redox  
374 system involved in arsenate reduction and considering that the reductase *ArsC* of *Fas* was inferred by  
375 homology to be from the Trx/TrxR-dependent class, Trx (Fig. 4A) and TrxR (Fig. 4B) activity analysis in  
376 cellular extracts were performed. In addition, we compared the Trx activity with representative of Gram-  
377 positive (*B. subtilis*) and Gram-negative (*E. coli*) bacteria. The activity of Trx and TrxR increased after the  
378 exposure to As (Fig. 4).

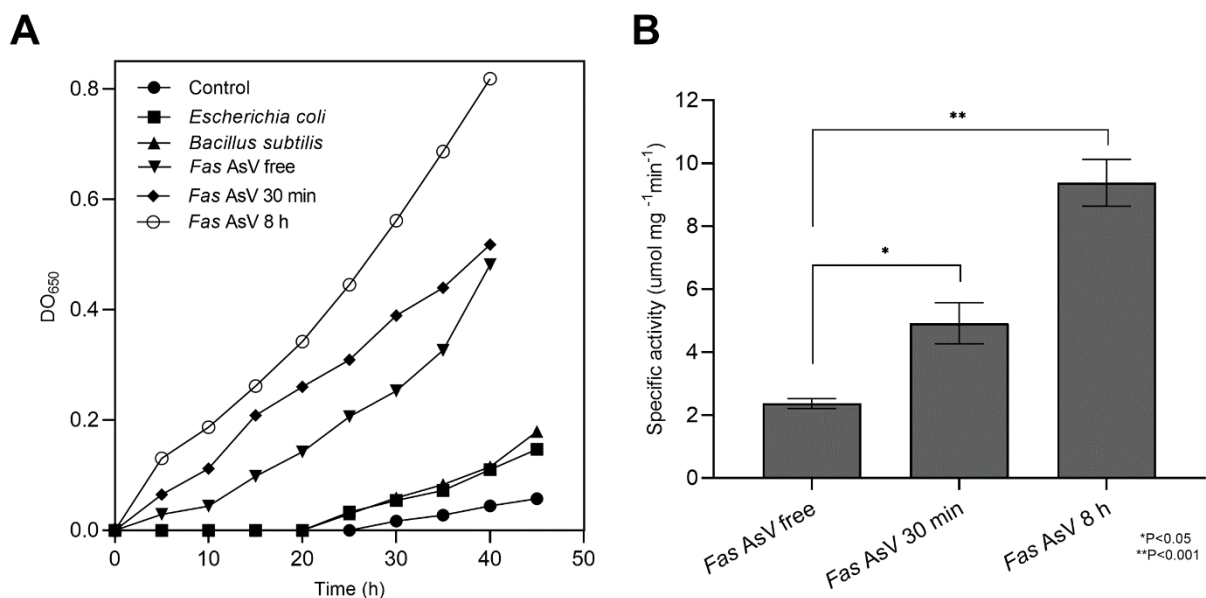

379  
380 **Figure 4. Measurement of Thioredoxin and Thioredoxin reductase activities.** (A) Thioredoxin  
381 activity. The reduction of the insulin alfa-chain was monitored at 650 nm in 50 µg of whole cellular  
382 extract derived from *Fas* cells exposed to AsV during 30 min and 8 h and was compared to the activity in  
383 50 µg of *Fas* cells grown without As and to other bacterial cultures. (B) Specific Thioredoxin reductase  
384 activity measured in a cell extract of *Fas* before and after AsV exposure.

385  
386 **Genomic features**  
387 **Genes involved in AsV reduction and energy metabolisms.** As noted in Table 2, arsenic  
388 detoxification genes (*arsABCMR*; *acr3*) are clearly present in *Fas* genome [13]. *Fas* also contains genes  
389 coding for two putative cytoplasmic arsenate reductases with only 32% of identity in their aminoacidic  
390 sequences, and both clustered with genes coding for the thioredoxin-coupled family (Fig. S2). The revisited  
391 genomic context of *arsC-2* (*arsD-arsR-pno-acr3-arsC-2*) [13] includes genes encoding for an arsenical  
392 resistant operon repressor (*ArsD*), a transcriptional regulator (*ArsR*), a 4Fe-4S ferredoxin (*Pno*, pyridine  
393 nucleotide-disulfide oxidoreductase NADH dehydrogenase), an arsenite efflux permease (*Acr3*), and the

394 arsenate reductase (*ArsC-2*) [16] (Table 2). ATPase encoding gene that provide energy for AsIII efflux  
395 (*arsA*), included in the canonical *ars* operon of other Clostridiales, was also found in *Fas* even in another  
396 genomic context.

397 By difference, the genomic context of *arsC-1* revealed the presence of genes coding for ferredoxin and  
398 a redox-active disulfide protein (thioredoxin).

399 In other way, two thioredoxin reductase (*TrxR*) encoding genes were also identified in the *Fas* genome  
400 by the BLAST analysis (Table 2).

401 The dissimilatory arsenate reductase *arrAB* gene cluster, involved in anaerobic respiration using AsV  
402 as electron acceptor, was not found in *Fas* as it has been previously reported [13]. However, several genes  
403 predicted to be involved in the synthesis of the molybdenum cofactor included in the known catalytic site  
404 of ArrA [16] as well as in other cytoplasmic iron–sulfur proteins that catalyze ferredoxin-dependent redox  
405 reactions [34] were identified in the genome of *Fas*.

406 The NADH-dependent reduced ferredoxin:NADP oxidoreductase,  $\alpha$  and  $\beta$  subunits (*NfnAB*) was  
407 evidenced by BLAST analysis against the *Pyrococcus furiosus* proteins [82] and it is conserved in the  
408 genomes of the *Fusibacter* genus. *NfnAB* is an electron bifurcating enzyme complex which couples the  
409 reduction of NADP<sup>+</sup> with reduced ferredoxin (*Fdred*) and the reduction of NADP<sup>+</sup> with NADH in a  
410 reversible reaction [50].

411 The constitutive *pit* (phosphate inorganic transport) and inducible *pst* (phosphate specific transport)  
412 operons involved in AsV uptake were also present in the *Fas* genome (Table 2).

413 The transmembrane ATP synthases (*FOF1-ATPases*) complex which is involved in ATP synthesis by  
414 obtaining the energy of a transmembrane gradient created by the difference in proton (H<sup>+</sup>) and in ATP  
415 hydrolysis in the reverse direction reactions are encoded in the *Fas* genome (Table S2). The order is  
416 conserved in the genomes of the *Fusibacter* genus (subunits *I, A, C, C, B, Delta, Gamma, Beta, Epsilon*).

417 In addition, the occurrence of the genes *rnfC, D, G, E, A, B* reported as encoding for the membrane-  
418 associated ferredoxin-dependent *Rhodobacter* nitrogen fixing (*Rnf*) complex responsible for  
419 transmembrane Na<sup>+</sup>/H<sup>+</sup> transport [40] and for Na<sup>+</sup>/H<sup>+</sup> gradient harvesting [36] was revealed by BLAST  
420 analysis in *Fas* genome, and in the whole genus (Table 2).

421 A search for genes involved in the fermentation process [83] in *Fusibacter* genomes revealed the  
422 occurrence of genes coding for an aldehyde dehydrogenase and butanoate metabolism in most of them,  
423 while genes involved in lactate/pyruvate metabolism were not present neither in *F. tunisiensis* nor in *F.*  
424 *paucivorans*. Genes codifying for pyruvate decarboxylase, alcohol dehydrogenase (cytochrome *c*), and  
425 proteins involved in the citrate cycle were absent (Table 3).

426

427 **Table 2. BLAST results of predicted proteins related to arsenic reduction and electron bifurcation in *Fas*.**

| Subsystem                          | Protein                   | Functional role                                                                       | NCBI                                    | Closest Protein Homology                |                                    |                      |
|------------------------------------|---------------------------|---------------------------------------------------------------------------------------|-----------------------------------------|-----------------------------------------|------------------------------------|----------------------|
|                                    |                           |                                                                                       |                                         | Species                                 | UniProt                            | E-value              |
| <b>Anaerobic reductases</b>        | AprB                      | Adenylylsulfate reductase $\beta$ -subunit /uncharacterized protein 4Fe-4S ferredoxin | WP_084389230                            | <i>Roseburia sp.</i> CAG:100            | R7R6L1                             | $4 \times 10^{-25}$  |
|                                    | ArsR-1                    | Arsenical resistance operon repressor                                                 | WP_069871038                            | <i>Dehalobacter sp.</i> DCA             | K4LCR7                             | $2 \times 10^{-43}$  |
| <b>Arsenic Resistance</b>          | ArsR-2                    | Arsenical resistance operon repressor                                                 | WP_069871893                            | <i>Desulfitobacterium hafniense</i>     | Q24NC4                             | $3 \times 10^{-53}$  |
|                                    | ArsA                      | Arsenical pump-driving ATPase (EC 3.6.3.16) /Arsenite-activated ATPase ArsA           | GAU79918                                | <i>Clostridium sp.</i> BNL1100          | H2J8R6                             | $2 \times 10^{-68}$  |
|                                    | ArsC-1                    | Arsenate reductase                                                                    | WP_069871881                            | <i>Geobacillus thermodenitrificans</i>  | A4INR2                             | $5 \times 10^{-29}$  |
|                                    | ArsC-2                    | Arsenate reductase                                                                    | WP_069871901                            | <i>Amphibacillus xylanus</i>            | K0J2A1                             | $2 \times 10^{-72}$  |
|                                    | ArsM-1                    | S-adenosylmethionine-dependent methyltransferase                                      | WP_069875650                            | <i>Methanosarcina acetivorans</i>       | Q8TJK1                             | $1 \times 10^{-10}$  |
|                                    | ArsM-2                    | S-adenosylmethionine-dependent methyltransferase                                      | WP_069876683                            | <i>Paenibacillus polymyxa</i>           | E3E8M9                             | $5 \times 10^{-91}$  |
|                                    | Acr3                      | Arsenical-resistance protein                                                          | WP_069871899                            | <i>Clostridium sticklandii</i>          | E3PWS9                             | 0                    |
|                                    | AoxS                      | Periplasmic sensor signal transduction his-kinase                                     | WP_069876025                            | <i>Alkaliphilus oremlandii</i>          | A8MKM5                             | 0                    |
|                                    | AoxR                      | Transcriptional regulator                                                             | WP_069876024                            | <i>Alkaliphilus oremlandii</i>          | A8MKM4                             | 0                    |
|                                    | <b>Electron Transport</b> | RnfA                                                                                  | Electron transport complex protein RnfA | WP_069873490                            | <i>Eubacterium acidaminophilum</i> | W8TJP4               |
| RnfB-1                             |                           | Electron transport complex protein RnfB                                               | GAU77413                                | <i>Alkaliphilus metalliredigens</i>     | A6TQH4                             | $4 \times 10^{-160}$ |
| RnfB-2                             |                           | Electron transport complex protein RnfB                                               | WP_069873707                            | <i>Acetobacterium woodii</i>            | H6LC27                             | $1 \times 10^{-120}$ |
| RnfC                               |                           | Electron transport complex protein RnfC                                               | WP_069873483                            | <i>Clostridium sticklandii</i>          | E3PRL8                             | 0                    |
| RnfD                               |                           | Electron transport complex protein RnfD                                               | WP_069873485                            | <i>Eubacterium acidaminophilum</i>      | W8T3U4                             | $5 \times 10^{-135}$ |
| RnfE                               |                           | Electron transport complex protein RnfE                                               | WP_069873489                            | <i>Clostridium bartlettii</i>           | R5Y4N2                             | $5 \times 10^{-92}$  |
| RnfG                               |                           | Electron transport complex protein RnfG                                               | WP_069873487                            | <i>Acetobacterium woodii</i>            | H6LC30                             | $1 \times 10^{-48}$  |
| <b>Oxidation-reduction process</b> | Fdx-1                     | Ferredoxin                                                                            | WP_069875417                            | <i>Anaerotignum neopropionicum</i>      | A0A136WCN9                         | $2 \times 10^{-63}$  |
|                                    | Fdx-2                     | Ferredoxin                                                                            | WP_069871884                            | <i>Anaerotignum neopropionicum</i>      | A0A136WCN9                         | $2 \times 10^{-47}$  |
|                                    | Fdx-3                     | Ferredoxin                                                                            | WP_069871041                            | <i>Sedimentibacter saalensis</i>        | A0A562J5A8                         | $1 \times 10^{-51}$  |
|                                    | Trx-1                     | Thioredoxin reductase/ FAD/NAD-binding                                                | WP_069873949                            | <i>Peptoclostridium acidaminophilum</i> | P50971                             | $2 \times 10^{-138}$ |
|                                    | Trx-2                     | Thioredoxin reductase/ FAD/NAD-binding                                                | WP_069874932                            | <i>Youngiibacter fragilis</i>           | V7I8R3                             | 0                    |

|                                                 |           |                                                                                |              |                                             |            |                        |
|-------------------------------------------------|-----------|--------------------------------------------------------------------------------|--------------|---------------------------------------------|------------|------------------------|
|                                                 | AhpC-1    | Alkyl Hydroperoxide Reductase Subunit C                                        | WP_069870906 | <i>Pyrococcus horikoshii</i>                | O58966     | 1 x 10 <sup>-84</sup>  |
|                                                 | AhpC-2    | Alkyl Hydroperoxide Reductase Subunit C                                        | GAU76052     | <i>Clostridium sticklandii</i>              | E3PTE6     | 8 x 10 <sup>-113</sup> |
|                                                 | NqrB      | Na(+)-translocating NADH-quinone reductase sub. B                              | GAU79379     | <i>Finegoldia magna</i>                     | E1KXR0     | 5 x 10 <sup>-115</sup> |
|                                                 | NqrC      | Na(+)-translocating NADH-quinone reductase sub. C                              | WP_069876132 | <i>Clostridium ultunense</i>                | M1ZGR7     | 9 x 10 <sup>-56</sup>  |
|                                                 | NqrD      | Na(+)-translocating NADH-quinone reductase sub. D                              | WP_069876131 | <i>Finegoldia magna</i>                     | D6S727     | 5 x 10 <sup>-91</sup>  |
|                                                 | NqrE      | Na(+)-translocating NADH-quinone reductase sub. E                              | WP_175438433 | <i>Psychromonas ingrahamii</i>              | A1SSY7     | 6 x 10 <sup>-65</sup>  |
|                                                 | NqrF      | Na(+)-translocating NADH-quinone reductase sub. F                              | GAU79375     | <i>Finegoldia magna</i>                     | B0S2C6     | 2 x 10 <sup>-124</sup> |
| <b>Phosphate metabolism</b>                     | Pit       | Probable low-affinity inorganic phosphate transporter                          | WP_069871941 | <i>Caldithrix abyssi</i>                    | H1XTK9     | 9 x 10 <sup>-137</sup> |
|                                                 | Aqps/GlpF | Glycerol uptake facilitator                                                    | WP_084389148 | <i>Bacillus subtilis</i>                    | P18156     | 1 x 10 <sup>-34</sup>  |
|                                                 | PstS      | Phosphate-binding protein                                                      | WP_069873924 | <i>Staphylococcus epidermidis</i>           | Q5HPF2     | 1 x 10 <sup>-60</sup>  |
|                                                 | PstA      | Phosphate transport system permease                                            | WP_084388970 | <i>Xylella Fastidiosa</i>                   | Q87C89     | 6 x 10 <sup>-24</sup>  |
|                                                 | PstB      | Phosphate import ATP-binding protein                                           | GAU77660     | <i>Clostridium sticklandii</i>              | E3PWC5     | 2 x 10 <sup>-163</sup> |
|                                                 | PstC      | Phosphate transport system permease                                            | GAU77658     | <i>Desulfitobacterium dichloroeliminans</i> | L0F6E8     | 3 x 10 <sup>-171</sup> |
| <b>Electron transfer flavoproteins</b>          | NfnA      | NADH-dependent reduced ferredoxin:NADP oxidoreductase, $\alpha$ subunit        | WP_069872221 | <i>Pyrococcus furiosus</i>                  | Q8U194     | 5 x 10 <sup>-103</sup> |
|                                                 | NfnB      | NADH-dependent reduced ferredoxin:NADP oxidoreductase, $\beta$ subunit         | WP_069872546 | <i>Pyrococcus furiosus</i>                  | Q8U195     | 2 x 10 <sup>-146</sup> |
|                                                 | EtfA-2    | Electron bifurcating butyryl-CoA dehydrogenase, $\alpha$ subunit               | WP_069875593 | <i>Ilyobacter polytropus</i>                | E3HC30     | 1 x 10 <sup>-161</sup> |
|                                                 | EtfB-2    | Electron bifurcating butyryl-CoA dehydrogenase, $\beta$ subunit                | WP_069875592 | <i>Maledivibacter halophilus</i>            | A0A1T5K5G4 | 3 x 10 <sup>-141</sup> |
|                                                 | Bcd       | Electron bifurcating butyryl-CoA dehydrogenase (NAD <sup>+</sup> , ferredoxin) | WP_069875591 | <i>Clostridium acetobutylicum</i>           | P52042     | 0                      |
|                                                 | EtfA-1    | Electron transfer flavoprotein, $\alpha$ subunit                               | WP_069871749 | <i>Paeniclostridium sordellii</i>           | A0A0A1SJ20 | 0                      |
|                                                 | EtfB-1    | Electron transfer flavoprotein, $\beta$ subunit                                | WP_069871747 | <i>Clostridium amylolyticum</i>             | A0A1M6NXL2 | 2 x 10 <sup>-133</sup> |
|                                                 | LdhD      | Lactate/Glycolate dehydrogenase, subunit LdhD/GlcD                             | WP_069871751 | <i>Caldisaliniibacter kiritimatiensis</i>   | R1AW66     | 0                      |
| <b>PFOR: pyruvate:ferredoxin oxidoreductase</b> | PorA-1    | Pyruvate synthase subunit PorA/Pyruvate oxidoreductase $\alpha$ chain          | WP_069871797 | <i>Thermotoga maritima</i>                  | O05651     | 2 x 10 <sup>-45</sup>  |
|                                                 | PorA-2    | Pyruvate:ferredoxin oxidoreductase, $\alpha$ subunit                           | WP_069874428 | <i>Acidaminobacter hydrogenoformans</i>     | A0A1G5RST4 | 6 x 10 <sup>-166</sup> |
|                                                 | PorB-1    | Pyruvate synthase subunit PorB/Pyruvate oxidoreductase $\beta$ chain           | WP_175438347 | <i>Thermotoga maritima</i>                  | Q56317     | 2 x 10 <sup>-93</sup>  |
|                                                 | PorB-2    | Pyruvate:ferredoxin oxidoreductase, $\beta$ subunit                            | WP_069874582 | <i>Thermohalobacter berrensis</i>           | A0A419T5M6 | 7 x 10 <sup>-135</sup> |

NCBI and UniProt denote the accession numbers



429 **Table 3. Presence of genes related to fermentative metabolism in *Fusibacter* genomes.**

| Metabolic Pathway                | Gene function                                                                   | Gene name         | COG     | KO     | <i>Fas</i> | 1   | 2   | 3   | 4   |
|----------------------------------|---------------------------------------------------------------------------------|-------------------|---------|--------|------------|-----|-----|-----|-----|
| <b>Glycolysis</b>                | Pyruvate decarboxylase                                                          | <i>pdh</i>        | COG3961 | K01568 | No         | No  | No  | No  | No  |
|                                  | Alcohol dehydrogenase (cytochrome <i>c</i> )                                    | <i>exaA</i>       | COG4993 | K00114 | No         | No  | No  | No  | No  |
|                                  | Alcohol dehydrogenase (NADP+)                                                   | AKR1A1            | COG0656 | K00002 | No         | No  | No  | Yes | No  |
|                                  | Alcohol dehydrogenase                                                           | <i>eutG</i>       | COG1454 | K04022 | Yes        | Yes | No  | Yes | Yes |
|                                  | Aldehyde dehydrogenase (NAD+)                                                   | ALDH              | COG1012 | K00128 | Yes        | Yes | Yes | Yes | Yes |
|                                  | Aldehyde dehydrogenase (NAD(P)+)                                                | ALDH3             | COG1012 | K00129 | Yes        | Yes | Yes | Yes | No  |
| <b>Pyruvate metabolism</b>       | L-lactate dehydrogenase                                                         | <i>ldh</i>        | COG0039 | K00016 | Yes        | Yes | Yes | Yes | Yes |
|                                  | D-lactate dehydrogenase (cytochrome)                                            | <i>dld</i>        | COG0277 | K00102 | Yes        | Yes | No  | No  | Yes |
| <b>Butanoate metabolism</b>      | Formate C-acetyltransferase                                                     | <i>pflD</i>       | COG1882 | K00656 | Yes        | Yes | No  | Yes | Yes |
|                                  | (R,R)-butanediol dehydrogenase/meso-butanediol dehydrogenase/diacetyl reductase | <i>butB</i>       | COG1063 | K00004 | Yes        | Yes | No  | Yes | Yes |
|                                  | Butyrate kinase                                                                 | <i>buk</i>        | COG3426 | K00929 | Yes        | Yes | Yes | Yes | Yes |
|                                  | Butyryl-CoA dehydrogenase                                                       | <i>bcd</i>        | COG1960 | K00248 | Yes        | Yes | Yes | Yes | Yes |
| <b>Citrate cycle (TCA cycle)</b> | Succinate dehydrogenase/fumarate reductase, flavoprotein subunit                | <i>sdhA, frdA</i> | COG1053 | K00239 | No         | No  | No  | No  | No  |
|                                  | Succinate dehydrogenase/fumarate reductase, iron-sulfur subunit                 | <i>sdhB, frdB</i> | COG0479 | K00240 | No         | No  | No  | No  | No  |
|                                  | Succinate dehydrogenase/fumarate reductase, cytochrome b subunit                | <i>sdhC, frdC</i> | COG2009 | K00241 | No         | No  | No  | No  | No  |
|                                  | Succinate dehydrogenase/fumarate reductase, membrane anchor subunit             | <i>sdhD, frdD</i> | COG2142 | K00242 | No         | No  | No  | No  | No  |

430 1: *F. ferrireducens* strain Q10-2<sup>T</sup>; 2: *F. tunisiensis* strain BELH1<sup>T</sup>; 3: *F. paucivorans* strain SEBR 4211<sup>T</sup>; 4: *Fusibacter*  
431 sp. strain A1 (NCBI data base).  
432

433 Searching for *etfB* genes in the *Fusibacter* genomes allowed us the finding of genomic contexts that  
434 would code for proteins involved in electron bifurcation. To verify the presence of key features (motifs 1  
435 and 2) of the electron bifurcating EtfBs, an alignment of putative *Fusibacter* EtfBs with previously  
436 characterized proteins was performed (Fig. 5). We found that all *Fusibacter* genomes code for group 2A  
437 EtfBs, *Fas* and *F. ferrireducens* also code for group 2B, while only *F. paucivorans* code for group 2C  
438 elements. In group 2A, all the putative proteins from *Fusibacter* process the key conserved residues. In  
439 group 2B, the Thr-94 is not conserved and is substituted by a valine in *Fas* and *F. ferrireducens* EtfB-1.

440 To better understand their possible role in *Fas*, we compared the genomic contexts of the *etf* encoding  
441 genes in *Fusibacter* (Fig. 6). All the analyzed genomes contain the gene encoding for the electron transfer  
442 flavoprotein subunit beta followed by the alpha subunit encoding gene. We found at least one copy of the  
443 genes encoding for EtfA, EtfB, and a putative butyryl-CoA dehydrogenase (Bcd) in *Fusibacter* genomes.  
444 Interestingly, *bcd* is always located upstream of *etf* genes cluster.

445

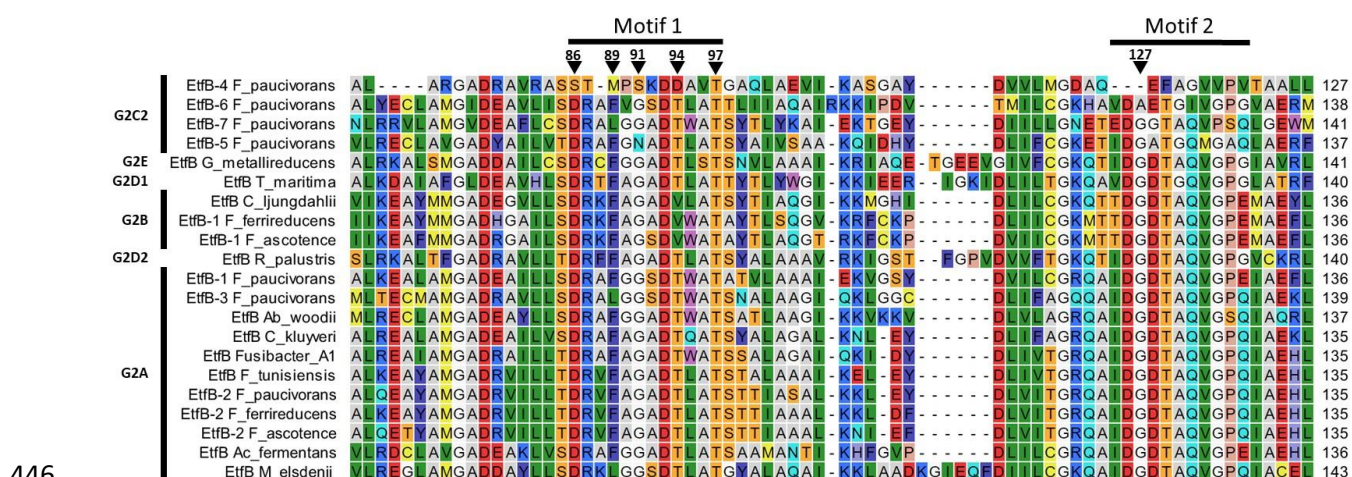

446  
447 **Figure 5. Protein sequence alignment to compare characterized electron-transferring flavoproteins**  
448 **with those from *Fusibacter*.** The horizontal bars indicate motifs 1 and 2, corresponding to the NADH- and  
449 FAD-binding sites in bifurcating EtfBs, respectively. The inverted triangles indicate residues proposed to  
450 coordinate NADH and FAD and the numeration corresponds to EtfB *R\_palustris*. The Etf groups are  
451 indicated on the left part. Representatives of EtfB groups are from *Geobacter metallireducens* GS-15  
452 (*G\_metalireducens*; YP\_383650), *Thermotoga maritima* MSB8 (*T\_maritima*; NP\_229330), *Clostridium*  
453 *ljungdahlii* PETCPETC (*C\_ljungdahlii*; YP\_003780321), *Rhodospseudomonas palustris* BisA53  
454 (*R\_palustris*; YP\_783418), *Acetobacterium woodii* WB1 (*Ab\_woodii*; AFA48355), *Clostridium kluveri*  
455 DSM 555 (*C\_kluveri*; YP\_001393858), *Acidaminococcus fermentans* VR4 (*Ac\_fermentans*;  
456 YP\_003398269), *Megasphaera elsdenii* T81 (*M\_elsdenii*; WP\_022498188). *Fusibacter* proteins are listed  
457 in Table S3.

458  
459 *Fas* and *F. ferrireducens* have two identical genetic arrangement. In context 1, *fadR* (which codifies for  
460 a transcriptional regulator) is located upstream *etfB-1* and *etfA-1* genes and downstream of both are *ldh* that  
461 codifies for a Lactate/Glycolate dehydrogenase (COG0277), *maly* that codifies a putative pyridoxal 5'-  
462 phosphate (PLP)-dependent C-S lyase (COG1168) and a gene that codifies for a hypothetical protein  
463 conserved in both genomes, while in context 2, only a *bcd* gene was identified upstream *etfBA-2* (Fig. 6).

464 Surprisingly, *F. paucivorans* contains seven copies of the *etfB-etfA* pair in six different contexts.  
465 Contexts 1, 2, 3, and 6 present the upstream arrangement with the *bcd* gene (Fig. 6). In context 4, *mhqN*,  
466 which codifies for a nitroreductase family protein (cd02137), is found upstream *etfBA-4* while *fixC* and  
467 *fixX*, which code for a flavoprotein dehydrogenase (COG0644) and a ferredoxin-like protein (COG2440)  
468 respectively. The fifth copy *etfBA-5* was identified downstream *fixX* (Fig. 6). In addition, *F. paucivorans*  
469 has four orphan *etfB* genes, possibly belonging to the 2C2 group due to its phylogeny and because it does  
470 not have any *etfA* or *etfB* genes fused in a single open-reading frame, as it has been described in the group  
471 2C1 [75]. Independently, we also identified in *F. paucivorans* genes coding for a nitrogenase reductase and  
472 maturation protein (*nifH*), the regulatory proteins P-II (*glnA* and *glnB*) and  $\alpha$  and  $\beta$  subunits of the  
473 nitrogenase (*nifD* and *nifK*). This opens the possibility that in this *Fusibacter* species some *etf* genes

474 participate in nitrogen fixation. Indeed, no other *Fusibacter* possesses nitrogen fixation genes (results not  
475 shown).

476 *Fusibacter* sp. A1 and *F. tunisiensis* had only one specific genomic context with *etf*-related genes. In  
477 *Fusibacter* sp. A1, downstream *etfA* we found *maoC*, that codifies for an acyl dehydratase (COG2030),  
478 followed by *yciA*, coding for an acyl-CoA hydrolase (COG1607), both related to lipid transport and  
479 metabolism (Fig. 6).

480 Finally, the subsystem approach to genome annotation performed by RAST/SEED [67] confirmed the  
481 relatedness of *Fas* to other members in the Clostridiales order (Table 2).

482

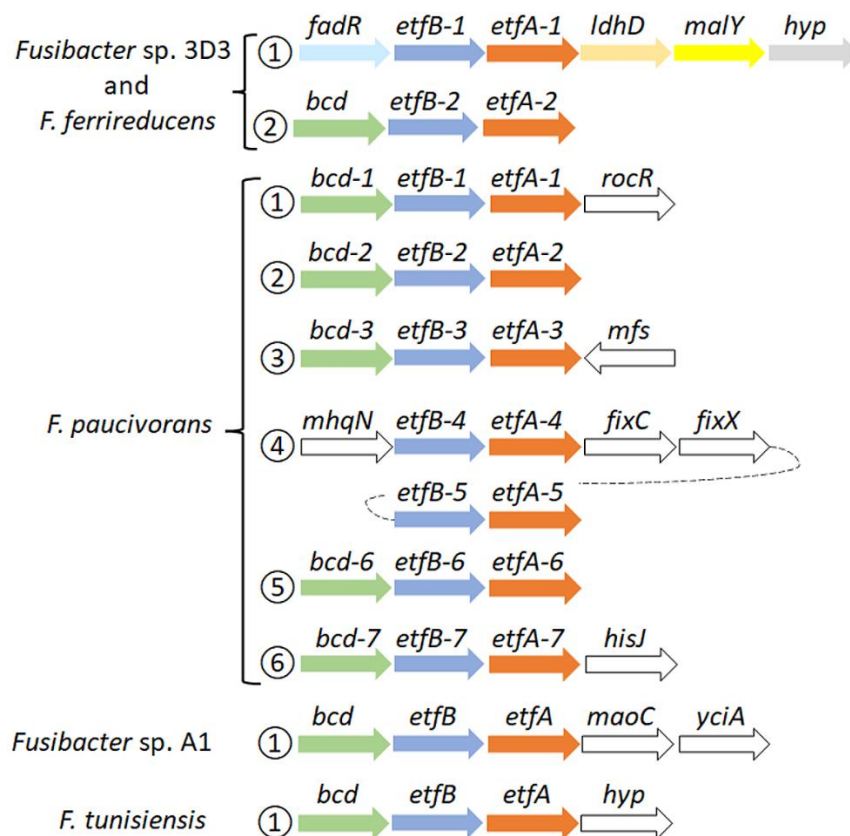

483  
484 **Figure 6. Genomic context of *etf* related genes in *Fusibacter*.** Numbers in circles indicate the occurrence  
485 of the *etf* copies. The arrows represent the orientation of the gene (size is not at scale), and the same colors  
486 indicate homology, except white. The gene products are described in the text and the gene product accession  
487 codes are listed in Table S3.

488  
489 **Detection of dissimilatory arsenate reductase *arrAB* genes.** The dissimilatory arsenate reductase  
490 *arrAB* gene cluster, involved in anaerobic respiration using AsV as electron acceptor, was not found in *Fas*  
491 (Fig. S3). This suggests that a different mechanism independent of ArrAB is conferring the ability to obtain  
492 energy from AsV reduction.

493  
494 **Heterologous expression of *arsC* genes.** Two *Fas* arsenate reductases encoding genes were identified  
495 in the genome sequence and specific primers were designed for their amplification from *Fas* genomic DNA

496 by PCR (Fig. S4). The amplified genes (*arsC-1<sub>Fas</sub>* and *arsC-2<sub>Fas</sub>*) were first cloned in the pGEM-T cloning  
497 vector, then released through enzymatic DNA digestion (Fig. S5) and ligated into the pTrcHis2A expression  
498 vector. The presence of the insert in the expression vector was checked by colony PCR (Fig. S6) or releasing  
499 the insert through plasmidic DNA digestion (Fig. S7). The activity of the gene product coded by the insert  
500 was tested by growing the recombinant *E. coli* WC3110 in the presence of AsV (Fig. 7). Complementation  
501 of the  $\Delta$ *arsC* *E. coli* WC3110 strain with the insert of both putative *arsC<sub>Fas</sub>* genes evidenced changes in  
502 AsV. A higher resistance to AsV was conferred by *ArsC-2<sub>Fas</sub>* compared to *ArsC-1<sub>Fas</sub>* (Fig 7). Growth of *E.*  
503 *coli* WC3110 strain without insert was not observed. These biological data are the first metabolic evidence  
504 needed to confirm the existence of the proposed metabolism in *Fas*.  
505

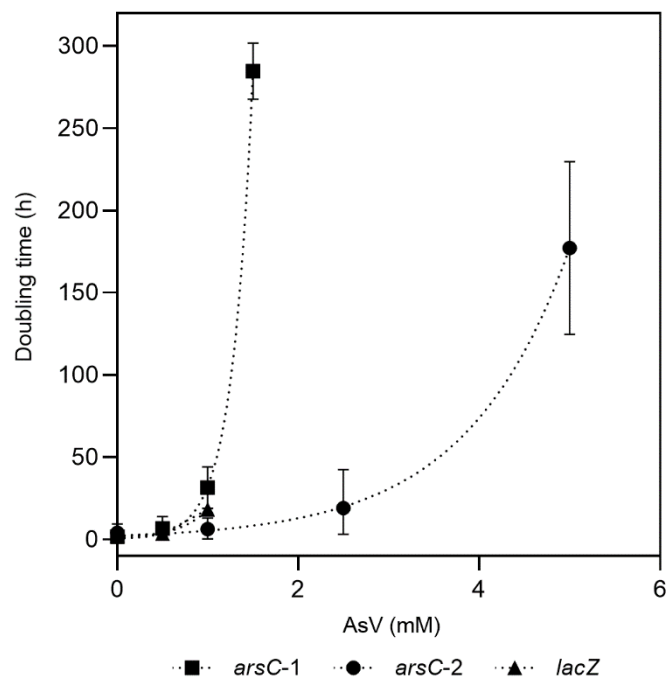

506  
507 **Figure 7. Evaluation of resistance to AsV conferred by *arsC-1* and *arsC-2* from *Fas*.** Growth of  $\Delta$ *arsC*  
508 *E. coli* WC3110 strain complemented by *arsC-1<sub>Fas</sub>* SHT, *arsC-2<sub>Fas</sub>* SHT or *lacZ* genes in presence of AsV.  
509

## 510 Discussion

511  
512 Phylogenetic analysis performed with the 16S rRNA genes had formerly grouped *Fas* inside the Gram-  
513 positive *Fusibacter* genus [13]. The *in silico* average nucleotide identity (ANI) with its closest relative type  
514 strain is 80.1% [78] which allows the confirmation that *Fas* affiliates with the *Fusibacter* genus (> 70%)  
515 [84], and support the proposal of *Fusibacter ascotence* as a new species of the genus (<95-96%).  
516

517 Taking together the observed growth features of *Fas* compared with other species of the *Fusibacter*  
518 genus (Table 1), and the insights into their genome sequences (Tables 2, 3 and S1) we are able to propose  
519 a rationale to justify the singularity of the *Fas* energetic metabolism.

- 520 • It grows strictly in anaerobiosis by reducing arsenate and using lactate as electron donor and its growth  
521 is improved by increasing AsV concentration (Fig. 1), being 2 mM the optimum level. To date, arsenic  
522 metabolism was not reported for the other *Fusibacter* species.
- 523 • Despite the arsenic reducing activity, the dissimilatory arsenate reductase *arrA* gene was not detected  
524 neither by the *Fas* genome sequence analysis [13] nor by PCR assays (Fig. S3). Moreover, neither *arrC*  
525 (coding for the membranous subunit suggested to play the role of menaquinone oxidation) reported to  
526 be present in some AsV reducing bacteria [8], nor *omc* (encoding an outer-surface, octaheme c-type  
527 cytochrome), and *cymA* (encoding a membrane-attached MKH2 oxidizing protein) genes reported in  
528 arsenic respiring *Shewanella* sp. strains [9, 85] were evidenced in the *Fas* genome (Table 2). The  
529 heterologous expression on  $\Delta$ *arsC* *E. coli* WC3110 strain has allowed us to confirm that ArsC-1 and  
530 ArsC-2 of *Fas* are functional and confer As resistance (Fig. 7). Both *arsC<sub>Fas</sub>* genes belong to the  
531 Enterobacterial clade one [20], and therefore encode a TrxR-dependent class of ArsC. In addition, the  
532 enzymatic analysis revealed a high Trx and TrxR activity in cells cultured with As, supporting the  
533 inference about the Trx dependence of the ArsC in *Fas*.
- 534 • All the previously reported strains inside the *Fusibacter* genus are fermentative bacteria [77-81].  
535 Interestingly, *Fas* can use lactate and glucose as substrates, while, *F. tunisiensis*, *F. paucivorans*, *F.*  
536 *bizertensis*, and *F. ferrireducens* can not utilize lactate [77-79, 81]. The genetic evidence agrees with  
537 the observed physiology on the culture conditions tested (Table 3).
- 538 • Furthermore, all the reported *Fusibacter* species have the ability to reduce sulfured nutriment [77-81].  
539 Sulfate reduction by *Fas* was demonstrated by sulfide and arsenic sulfide mineral production, and  
540 thiosulfate reduction was also positively checked. In addition, thiosulfate and sulfate were more efficient  
541 than S<sup>0</sup> to stimulate cell growth (Fig. S1) perhaps because of the low solubility of S<sup>0</sup>. Other *Fusibacter*  
542 species reduce thiosulfate and sulfur (but not sulfate or sulfite), and only *F. ferrireducens* shares with  
543 *Fas* the ability to reduce sulfate. Neither sulfate nor thiosulfate were involved in energy conservation in  
544 *Fas* as it has been reported for the other members of the *Fusibacter* genus [79, 80]. That feature could  
545 also be related to other cellular mechanisms present in microorganisms to cope with stress, such as  
546 arsenic stress, i.e. sulfur assimilation [86]. *F. paucivorans* growth experiments with sulfured nutriment  
547 revealed that the addition of thiosulfate relieved the inhibition produced by the H<sub>2</sub> released by the  
548 glucose fermenting metabolism. In addition, a differential pattern of glucose fermentation products was  
549 observed in cultures with thiosulfate, represented by a decrease in butyrate levels together with an  
550 increase in acetate production [77]. As well as for other fermenting bacteria, those results confirm the  
551 Huber hypothesis that sulfur reduction plays a role of an electron sink reaction to prevent H<sub>2</sub>  
552 accumulation from fermentation metabolism [87]. Therefore, the lactate/butyrate fermentation  
553 metabolism in *Fusibacter* should be regulated by the cellular redox state resembling the reported for  
554 other *Firmicutes* [88]. Interestingly a redox-sensing transcriptional repressor gene encoding a protein  
555 whose DNA binding activity is modulated by the NADH/NAD<sup>+</sup> ratio [88] is located downstream to the  
556 Acetyl-CoA acetyltransferase encoding gene in *Fas* and other *Fusibacter* genomes (data not shown).

- 557 The Acetyl-CoA acetyltransferase is in charge of the first step during the Acetyl-CoA fermentation to  
558 Butyrate pathway after the split in the three alternative fermentation pathways.
- 559 • The results obtained from the growth experiments with and without addition of the protonophore TCS  
560 and the ionophore ETH2120 [41] revealed that *Fas* does require the formation of a proton gradient to  
561 get energy for growing on AsV (Fig. 3). In addition, the occurrence of genes encoding for the Rnf  
562 complex in *Fas* genome (Table 2) allows us to infer the capacity of *Fas* for energy  
563 conservation/utilization via proton translocating ferredoxin oxidation/reduction. Finally, the F<sub>0</sub>F<sub>1</sub>ATP  
564 synthase would couple ATP synthesis to the electrochemical gradient based on differences in the proton  
565 concentration generated.
  - 566 • In agreement with the genomic characterization of the ArsC<sub>*Fas*</sub> inside the Trx-dependent class, the  
567 enzymatic analysis has shown an increased level of Trx and TrxR activities after AsV addition (Fig. 4).  
568 Besides, it is known that thioredoxin is also involved in sulfur assimilation evidenced in the early  
569 response to arsenic and in maintaining the cellular redox state [86].
  - 570 • *Fas* has all the known genomic resources for the pathway of lactate fermentation to acetate and butyrate  
571 in *Firmicutes* [88]. Interestingly, the genomes of *Fas* and *F. ferrireducens* contain two genomic contexts  
572 that may be involved in the electron bifurcation process of the electron-transferring flavoproteins  
573 (EtfAB) type [50]. According to the model proposed [88] for lactate and acetate transformation to  
574 butyrate, there must be a lactate dehydrogenase/EtfAB complex and a butyryl CoA  
575 dehydrogenase/EtfAB complex (Fig. 8A). We propose that contexts 1 and 2 encode the elements for the  
576 transformation of lactate and butyryl CoA, respectively (Fig. 6). Acetate production was observed in  
577 *Fas* and butyrate plus acetate production was confirmed in *F. paucivorans* [77]. *Clostridium butyricum*  
578 and *Acetobacterium woodii* were shown to transform lactate during fermentation by an enzyme complex  
579 of Ldh, EtfAB [57, 88]. Analysis of the genomes of *C. butyricum*, and *A. woodii* among others, showed  
580 conservation of the genetic context of at least the genes coding for these proteins [52, 57, 88]. Proteins  
581 related to butyryl CoA transformation involve butyryl-CoA dehydrogenase/electron transfer  
582 flavoproteins EtfA and EtfB [89]. This complex is also encoded in a conserved array [52, 88]), like the  
583 genomic context 2 found in *Fas* (Fig. 6).
  - 584 • Furthermore, the occurrence of a NADH dependent reduced ferredoxin NADP<sup>+</sup> oxidoreductase  
585 complex, the second type of FBEB complexes [50] in *Fas* genome (Table 2), permits to hypothesize  
586 that energy for growth should be provided by the energetic link of cellular ferredoxin and NAD<sup>+</sup> pools  
587 through the Rnf function to generate chemiosmotic potential when ferredoxin is higher than NADH  
588 level or, in reverse, for ferredoxin generation when NADH is higher [90], for a more efficient  
589 metabolism in anoxic environments. In addition, Nfn could play the reported role of balancing the redox  
590 state of the pyridine nucleotide NAD(H) and NADP(H) pools and, in that way, favor the catabolic or  
591 anabolic reactions [52].
  - 592 • The occurrence of multiple and different bifurcating (Bf) enzymes observed in *Fas* has been already  
593 detected in several *Firmicutes* genomes, and Bf-Ldh, Bf-Bcd and Nfn, that share NAD(H) and  
594 ferredoxin as common substrates, usually participate in those combinations [82].

595

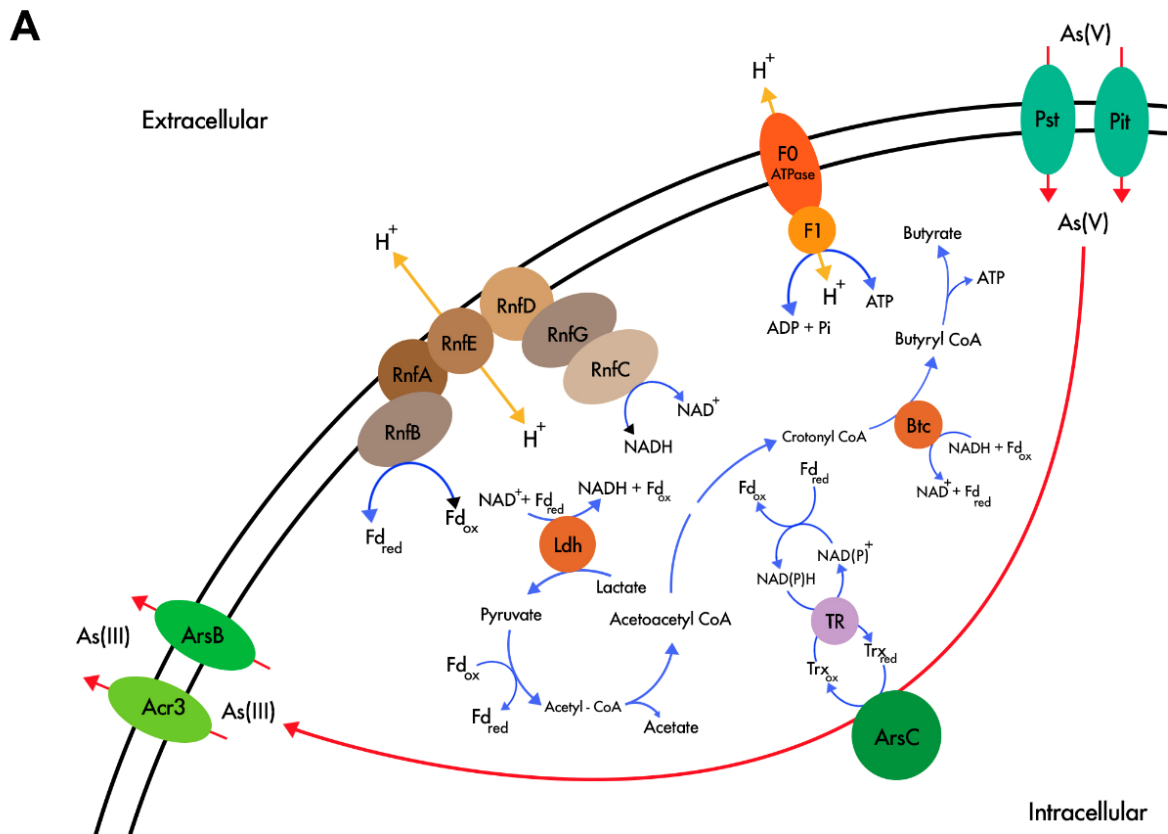

**B**

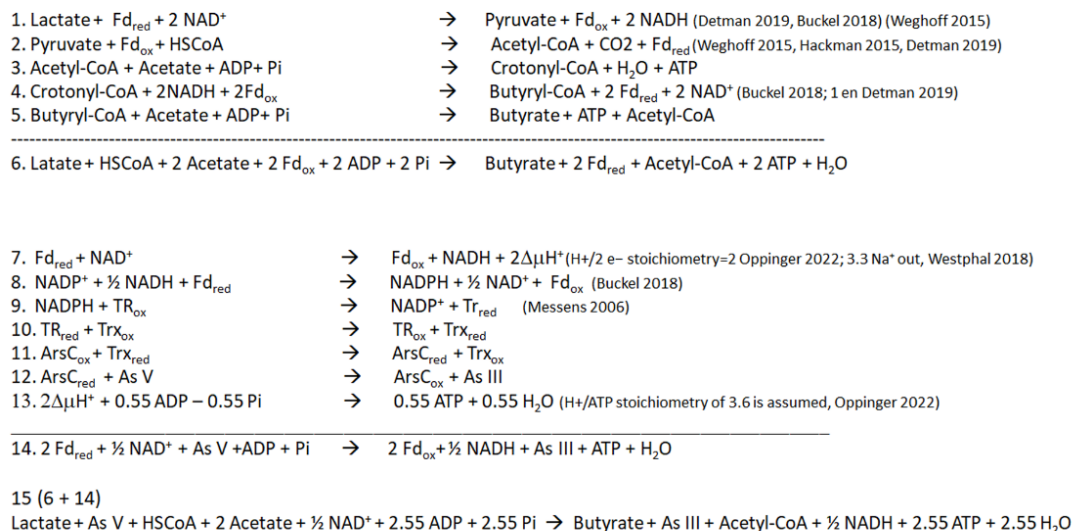

596

597 **Figure 8. Flavin based electron bifurcation and its link with AsV reduction.** (A) Working model of the  
598 involvement of FBEB and the AsV reduction in *Fas*. (B) Stoichiometry of the metabolism proposed in (A).

599

600 The revealed specialization for lactate fermentative metabolism present in *Fas* and already reported in  
601 *Firmicutes* [88] with the participation of FBEB and Rnf supports the availability of NADH and Fd<sub>red</sub> and  
602 ATP generation (Figure 8 and Equations 1-5 in Fig. 8B). NADH and Fd<sub>red</sub> should be the soluble electron  
603 carriers required for producing NADPH and starting the cascade of thiol reductases  
604 (NADPH→TR→Trx→ArsC) [29] involved in AsV reduction by ArsC Trx type of *Fas* (Fig. 8A and Fig.

605 8B, equations 7-15). In that way, besides to generate  $\Delta\mu_{H^+}$  coupled to ATP synthesis by ATP synthase,  
606 the FBEB would conduct the reduction of AsV by providing the low potential ferredoxin. The AsIII efflux  
607 pumps present in the Ars operon allow AsIII elimination and As<sub>4</sub>S<sub>4</sub> precipitation outside the cells.

608 The analysis of the reported stoichiometry [29, 37, 50, 57, 90] hints us that it is plausible that AsV could  
609 play a role similar to CO<sub>2</sub> in acetogenic bacteria [39], of terminal acceptor of the electrons derived from  
610 reduced ferredoxin, the low potential electron carrier generated by electron bifurcation (Fig. 8B).

611 This rationale allows us to formulate a hypothetic metabolism (Fig. 8A) similar to the evidenced in  
612 other anaerobic microorganisms [51]: Arsenate reduction provides additional energy to arsenic reducing  
613 fermenters independent of ArrAB for growing through a new mechanism that involves soluble ferredoxin  
614 electron carrier, FBEB complexes, the cytoplasmic ArsC, and the membrane-associated ion-translocating  
615 complex Rnf. As previously reported, this system could be regulated by the redox state [88]. The energetic  
616 link of cellular NADH and ferredoxin should be the way in which the electrons reach AsV in the cytoplasm,  
617 converting it in an electron sink/electron acceptor, similar to the role assigned to ferric iron in *F.*  
618 *ferrireducens* [78].

619 Finally, metagenomic analysis evidenced that the Trx-ArsC is much more diverse in the high altitude  
620 modern stromatolites in the Argentinian Puna (Altiplano), than at the base of the Socompa Volcano [91]  
621 characterized by high arsenic contents. Furthermore, the ecological relevance of the proposed metabolism  
622 was suggested by the dominance of genes predicted for encoding the Trx-ArsC versus Grx-ArsC  
623 cytoplasmic arsenate reductase in arsenic rich environments on a regional survey at the High Andes [31]  
624 where *Fas* was isolated from.

625  
626  
627 **Acknowledgements:** The authors are appreciative of the technical support of Olga Encalada, Dr. Antonio  
628 Serrano, Dr. Lorena Escudero, Dr.(C) Cinthya Tebes-Cayo, Dr. Nia Oetiker, and of María Celia Chong D.  
629 for her support in the model designing.

630  
631 **Funding:** This article was funded by FONDECYT Project 1100795 from the Chilean National Commission  
632 for Science and Technology (CONICYT), FIC-R 2015/BIP 40013423-0 and the Research Support from  
633 Minera Escondida Ltda. Project 32002137.

634



## 635 References

- 636
- 637 1. Amend, J.P., et al., *Microbial Arsenic Metabolism and Reaction Energetics*, in *Arsenic: Environmental*  
638 *Geochemistry, Mineralogy, and Microbiology*, R.J. Bowell, et al., Editors. 2014. p. 391-433.
  - 639 2. Ahmann, D., et al., *Microbe grows by reducing arsenic*. *Nature (London)*, 1994. **371**: p. 750.
  - 640 3. Lavermann, A., et al., *Growth of strain SES-3 with arsenate and other diverse electron acceptors*.  
641 *Appl. Environ. Microbiol*, 1995. **61**: p. 3556-3561.
  - 642 4. Muller, D., et al., *Arsenite oxidase aox genes from a metal-resistant beta-proteobacterium*. *Journal*  
643 *of Bacteriology*, 2003. **185**(1): p. 135-141.
  - 644 5. Santini, J.M., I.C.A. Streimann, and R.N.v. Hoven, *Bacillus macyae sp. nov., an arsenate-respiring*  
645 *bacterium isolated from an Australian gold mine*. *Int J Syst Evol Microbiol*, 2004. **54**(6): p. 2241-  
646 2244.
  - 647 6. Budinoff, C.R. and J.T. Hollibaugh, *Arsenite-dependent photoautotrophy by an Ectothiorhodospira-*  
648 *dominated consortium*. *Isme Journal*, 2008. **2**(3): p. 340-343.
  - 649 7. Kulp, T.R., et al., *Arsenic (III) fuels anoxygenic photosynthesis in hot spring biofilms from Mono Lake,*  
650 *California*. *Science*, 2008. **321**(5891): p. 967-970.
  - 651 8. van Lis, R., et al., *Arsenics as bioenergetic substrates*. *Biochim Biophys Acta*, 2013. **1827**(2): p. 176-  
652 88.
  - 653 9. Kim, D.H., et al., *Draft genome sequence of Shewanella sp. strain HN-41, which produces arsenic-*  
654 *sulfide nanotubes*. *J Bacteriol*, 2011. **193**(18): p. 5039-40.
  - 655 10. Blum, J.S., et al., *Arsenate-dependent growth is independent of an ArrA mechanism of arsenate*  
656 *respiration in the termite hindgut isolate Citrobacter sp strain TSA-1*. *Canadian Journal of*  
657 *Microbiology*, 2018. **64**(9): p. 619-627.
  - 658 11. Macy, J.M., et al., *Two new arsenate/sulfate-reducing bacteria: mechanisms of arsenate reduction*.  
659 *Arch Microbiol*, 2000. **173**(1): p. 49-57.
  - 660 12. Cozen, A.E., et al., *Transcriptional Map of Respiratory Versatility in the Hyperthermophilic*  
661 *Crenarchaeon Pyrobaculum aerophilum*. *Journal of Bacteriology*, 2009. **191**(3): p. 782-794.
  - 662 13. Serrano, A.E., et al., *First draft genome sequence of a strain from the genus Fusibacter isolated from*  
663 *Salar de Ascotan in Northern Chile*. *Standards in Genomic Sciences*, 2017. **12**: p. 9.
  - 664 14. Kuai, L., A.A. Nair, and M.F. Polz, *Rapid and simple method for the most-probable-number*  
665 *estimation of arsenic-reducing bacteria*. *Appl Environ Microbiol*, 2001. **67**(7): p. 3168-73.
  - 666 15. Paez-Espino, D., et al., *Microbial responses to environmental arsenic*. *Biometals*, 2009. **22**(1): p. 117-  
667 130.
  - 668 16. Slyemi, D. and V. Bonnefoy, *How prokaryotes deal with arsenic?*. *Environmental Microbiology*  
669 *Reports*, 2012. **4**(6): p. 571-586.
  - 670 17. Kleerebezem, M., et al., *Complete genome sequence of Lactobacillus plantarum WCFS1*.  
671 *Proceedings of the National Academy of Sciences*, 2003. **100**(4): p. 1990-1995.
  - 672 18. Villadangos, A.F., et al., *Corynebacterium glutamicum survives arsenic stress with arsenate*  
673 *reductases coupled to two distinct redox mechanisms*. *Molecular Microbiology*, 2011. **82**(4): p. 998-  
674 1014.
  - 675 19. Mukhopadhyay, R. and B.P. Rosen, *Arsenate reductases in prokaryotes and eukaryotes*.  
676 *Environmental Health Perspectives*, 2002. **110**: p. 745-748.
  - 677 20. Zegers, I., et al., *Arsenate reductase from S. aureus plasmid pI258 is a phosphatase drafted for*  
678 *redox duty*. *Nature Structural Biology*, 2001. **8**(10): p. 843-7.
  - 679 21. Ordonez, E., et al., *Arsenate reductase, mycothiol, and mycoredoxin concert thiol/disulfide*  
680 *exchange*. *Journal of Biological Chemistry*, 2009. **284**(22): p. 15107-16.
  - 681 22. Meng, X.G., C.Y. Jing, and G.P. Korfiatis, *A review of redox transformation of arsenic in aquatic*  
682 *environments*, in *Biogeochemistry of Environmentally Important Trace Elements*, Y. Cai and O.C.  
683 Braids, Editors. 2003, American Chemical Society: Washington, DC. p. 70-83.
  - 684 23. Rosen, B.P. and Z. Liu, *Transport pathways for arsenic and selenium: a minireview*. *Environment*  
685 *International*, 2009. **35**(3): p. 512-5.
  - 686 24. Rosen, B.P., et al., *Mechanism of the ArsA ATPase*. *Biochimica Et Biophysica Acta-Biomembranes*,  
687 1999. **1461**(2): p. 207-215.

- 688 25. Zhou, T.Q., et al., *Structure of the ArsA ATPase: the catalytic subunit of a heavy metal resistance*  
689 *pump*. *Embo Journal*, 2000. **19**(17): p. 4838-4845.
- 690 26. Li, X. and L.R. Krumholz, *Regulation of arsenate resistance in Desulfovibrio desulfuricans G20 by an*  
691 *arsRBCC operon and an arsC gene*. *Journal of Bacteriology*, 2007. **189**(10): p. 3705-11.
- 692 27. Achour-Rokbani, A., et al., *Characterization of the ars gene cluster from extremely arsenic-resistant*  
693 *Microbacterium sp. strain A33*. *Applied and Environmental Microbiology*, 2010. **76**(3): p. 948-55.
- 694 28. Cuebas, M., et al., *Arsenate reduction and expression of multiple chromosomal ars operons in*  
695 *Geobacillus kaustophilus A1*. *Microbiology*, 2011. **157**(Pt 7): p. 2004-11.
- 696 29. Messens, J. and S. Silver, *Arsenate reduction: thiol cascade chemistry with convergent evolution*.  
697 *Journal of Molecular Biology*, 2006. **362**(1): p. 1-17.
- 698 30. Escudero, L.V., *Diversity of arsenic genes involved in arsenic cycle in culture and environmental*  
699 *sample*. 2009, Universidad Autónoma de Barcelona: Barcelona, España.
- 700 31. Escudero, L.V., et al., *Distribution of Microbial Arsenic Reduction, Oxidation and Extrusion Genes*  
701 *along a Wide Range of Environmental Arsenic Concentrations*. *Plos One*, 2013. **8**(10).
- 702 32. Lara, J., et al., *Enrichment of arsenic transforming and resistant heterotrophic bacteria from*  
703 *sediments of two salt lakes in Northern Chile*. *Extremophiles*, 2012. **16**(3): p. 523-538.
- 704 33. Herrmann, G., et al., *Energy conservation via electron-transferring flavoprotein in anaerobic*  
705 *bacteria*. *J Bacteriol*, 2008. **190**(3): p. 784-91.
- 706 34. Buckel, W. and R.K. Thauer, *Energy conservation via electron bifurcating ferredoxin reduction and*  
707 *proton/Na<sup>+</sup> translocating ferredoxin oxidation*. *Biochimica Et Biophysica Acta-Bioenergetics*, 2013.  
708 **1827**(2): p. 94-113.
- 709 35. Bertsch, J.P., A.; Buckel, W.; Müller, V., *An Electron-bifurcating Caffeyl-CoA Reductase*. *THE*  
710 *JOURNAL OF BIOLOGICAL CHEMISTRY*, 2013. **288**(16): p. 11304 - 11311.
- 711 36. Biegel, E., et al., *Biochemistry, evolution and physiological function of the Rnf complex, a novel ion-*  
712 *motive electron transport complex in prokaryotes*. *Cellular and Molecular Life Sciences*, 2011. **68**(4):  
713 p. 613-634.
- 714 37. Hackmann, T.J. and J.L. Firkins, *Electron transport phosphorylation in rumen butyrvibrios:*  
715 *unprecedented ATP yield for glucose fermentation to butyrate*. *Frontiers in Microbiology*, 2015. **6**: p.  
716 622.
- 717 38. Schuchmann, K. and V. Müller, *Energetics and application of heterotrophy in acetogenic bacteria*.  
718 *Applied and Environmental Microbiology*, 2016.
- 719 39. Buckel, W. and R.K. Thauer, *Flavin-Based Electron Bifurcation, Ferredoxin, Flavodoxin, and*  
720 *Anaerobic Respiration With Protons (Ech) or NAD(+)(Rnf) as Electron Acceptors: A Historical Review*.  
721 *Frontiers in Microbiology*, 2018. **9**.
- 722 40. Muller, V., et al., *Discovery of a ferredoxin:NAD<sup>+</sup>-oxidoreductase (Rnf) in Acetobacterium woodii: a*  
723 *novel potential coupling site in acetogens*. *Ann N Y Acad Sci*, 2008. **1125**: p. 137-46.
- 724 41. Tremblay, P.L., et al., *The Rnf complex of Clostridium ljungdahlii is a proton-translocating*  
725 *ferredoxin:NAD<sup>+</sup> oxidoreductase essential for autotrophic growth*. *MBio*, 2012. **4**(1): p. e00406-12.
- 726 42. Jeong, J., et al., *Energy Conservation Model Based on Genomic and Experimental Analyses of a*  
727 *Carbon Monoxide-Utilizing, Butyrate-Forming Acetogen, Eubacterium limosum KIST612*. *Appl*  
728 *Environ Microbiol*, 2015. **81**(14): p. 4782-90.
- 729 43. Hess, V., et al., *A genome-guided analysis of energy conservation in the thermophilic, cytochrome-*  
730 *free acetogenic bacterium Thermoanaerobacter kivui*. *Bmc Genomics*, 2014. **15**: p. 1139.
- 731 44. Kumagai, H.F., T.; Matsubara, H.; Saeki, K., *Membrane localization, topology, and mutual*  
732 *stabilization of the rnfABC gene products in Rhodobacter capsulatus and implications for a new*  
733 *family of energy-coupling NADH oxidoreductases*. *Biochemistry*, 1997. **36**: p. 5509 - 5521.
- 734 45. Hrea, T.N.M., K. G.; Herce, H. D.; Duffy, E. B.; Bourges, A.; Pryshchep, S.; Juarez, O.; Barquera, B.,  
735 *Complete Topology of the RNF Complex from Vibrio cholerae*. *Biochemistry*, 2015. **54**: p. 2443 -  
736 2455.
- 737 46. Hess, V.S., K.; Müller, V., *The Ferredoxin:NAD Oxidoreductase (Rnf) from the Acetogen*  
738 *Acetobacterium woodii Requires Na and Is Reversibly Coupled to the Membrane Potential*. *THE*  
739 *JOURNAL OF BIOLOGICAL CHEMISTRY*, 2013. **288**(44): p. 31496 - 31502.
- 740 47. Meyer, B.K., J. V.; Price, M. N.; Ray, J.; Deutschbauer, A. M.; Arkin, A. P.; Stahl, D. A., *The energy-*  
741 *conserving electron transfer system used by Desulfovibrio alaskensis strain G20 during pyruvate*

- 742 *fermentation involves reduction of endogenously formed fumarate and cytoplasmic and membrane-*  
743 *bound complexes, Hdr-Flox and Rnf.* Environmental Microbiology, 2014. **16**(11): p. 3463 - 3486.
- 744 48. Biegel, E. and V. Mueller, *A Na<sup>+</sup>-translocating Pyrophosphatase in the Acetogenic Bacterium*  
745 *Acetobacterium woodii.* Journal of Biological Chemistry, 2011. **286**(8): p. 6080-6084.
- 746 49. Hess, V., et al., *Caffeate respiration in the acetogenic bacterium Acetobacterium woodii: a*  
747 *coenzyme A loop saves energy for caffeate activation.* Appl Environ Microbiol, 2013. **79**(6): p. 1942-  
748 7.
- 749 50. Buckel, W. and R.K. Thauer, *Flavin-Based Electron Bifurcation, A New Mechanism of Biological*  
750 *Energy Coupling.* Chemical Reviews, 2018. **118**(7): p. 3862-3886.
- 751 51. Peters, J.W., et al., *A new era for electron bifurcation.* Current Opinion in Chemical Biology, 2018.  
752 **47**: p. 32-38.
- 753 52. Poudel, S., et al., *Origin and Evolution of Flavin-Based Electron Bifurcating Enzymes.* Frontiers in  
754 Microbiology, 2018. **9**.
- 755 53. Liang, J.Y., H.Y. Huang, and S.N. Wang, *Distribution, Evolution, Catalytic Mechanism, and*  
756 *Physiological Functions of the Flavin-Based Electron-Bifurcating NADH-Dependent Reduced*  
757 *Ferredoxin: NADP(+) Oxidoreductase.* Frontiers in Microbiology, 2019. **10**.
- 758 54. Hess, V., et al., *Occurrence of ferredoxin:NAD(+) oxidoreductase activity and its ion specificity in*  
759 *several Gram-positive and Gram-negative bacteria.* PeerJ, 2016. **4**: p. e1515.
- 760 55. Wang, L.B., P.; Li, C.; McInerney, M. J.; Krumholz, L. R., *The role of Rnf in ion gradient formation in*  
761 *Desulfovibrio alaskensis.* PeerJ, 2016.
- 762 56. Price, M.N.R., J.; Wetmore, K. M.; Kuehl, J. V.; Bauer, S.; Deutschbauer, A. M.; Arkin, A. P. , *The*  
763 *genetic basis of energy conservation in the sulfate-reducing bacterium Desulfovibrio alaskensis G20.*  
764 Frontiers in Microbiology, 2014. **5**.
- 765 57. Weghoff, M.C., J. Bertsch, and V. Müller, *A novel mode of lactate metabolism in strictly anaerobic*  
766 *bacteria.* Environmental Microbiology, 2015. **17**(3): p. 670-677.
- 767 58. Marchler-Bauer, A., et al., *CDD: a Conserved Domain Database for protein classification.* Nucleic  
768 Acids Res, 2005. **33**(Database issue): p. D192-6.
- 769 59. Valdés, N., et al., *Draft Genome Sequence of Nitrospira sp. Strain A-D6, an Arsenic-Resistant*  
770 *Gammaproteobacterium Isolated from a Salt Flat.* Genome Announcements, 2014. **2**(6).
- 771 60. Wang, Y., et al., *Effects of different dissolved organic matter on microbial communities and arsenic*  
772 *mobilization in aquifers.* Journal of hazardous materials, 2021. **411**: p. 125146.
- 773 61. Wang, L.Y., et al., *The role of Rnf in ion gradient formation in Desulfovibrio alaskensis.* Peerj, 2016.  
774 **4**.
- 775 62. Norambuena, J., et al., *Thiol/Disulfide System Plays a Crucial Role in Redox Protection in the*  
776 *Acidophilic Iron-Oxidizing Bacterium Leptospirillum ferriphilum.* Plos One, 2012. **7**(9).
- 777 63. Arner, E.S., L. Zhong, and A. Holmgren, *Preparation and assay of mammalian thioredoxin and*  
778 *thioredoxin reductase.* Methods Enzymol, 1999. **300**: p. 226-39.
- 779 64. Holmgren, A., *Thioredoxin catalyzes the reduction of insulin disulfides by dithiothreitol and*  
780 *dihydrolipoamide.* J Biol Chem, 1979. **254**(19): p. 9627-32.
- 781 65. Malasarn, D., et al., *arrA Is a Reliable Marker for As(V) Respiration.* Science, 2004. **306**(5695): p.  
782 455-.
- 783 66. Green, M.R. and J. Sambrook, *Screening Bacterial Colonies Using X-Gal and IPTG: alpha-*  
784 *Complementation.* Cold Spring Harb Protoc, 2019. **2019**(12).
- 785 67. Brettin, T., et al., *RASTtk: A modular and extensible implementation of the RAST algorithm for*  
786 *building custom annotation pipelines and annotating batches of genomes.* Scientific Reports, 2015.  
787 **5**(1): p. 8365.
- 788 68. Altschul, S.F. and D.J. Lipman, *Protein database searches for multiple alignments.* Proc Natl Acad Sci  
789 U S A, 1990. **87**(14): p. 5509-13.
- 790 69. Altschul, S.F., et al., *Gapped BLAST and PSI-BLAST: a new generation of protein database search*  
791 *programs.* Nucleic Acids Research, 1997. **25**(17): p. 3389-3402.
- 792 70. Punta, M., et al., *The Pfam protein families database.* Nucleic Acids Res, 2012. **40**(Database issue):  
793 p. D290-301.
- 794 71. Sigrist, C.J., et al., *PROSITE: a documented database using patterns and profiles as motif descriptors.*  
795 Brief Bioinform, 2002. **3**(3): p. 265-74.

- 796 72. Tatusov, R.L., et al., *The COG database: an updated version includes eukaryotes*. BMC  
797 Bioinformatics, 2003. **4**: p. 41.
- 798 73. Benson, D.A., et al., *GenBank*. Nucleic Acids Res, 2009. **37**(Database issue): p. D26-31.
- 799 74. Davidsen, T., et al., *The comprehensive microbial resource*. Nucleic Acids Res, 2010. **38**(Database  
800 issue): p. D340-5.
- 801 75. Garcia Costas, A.M., et al., *Defining Electron Bifurcation in the Electron-Transferring Flavoprotein*  
802 *Family*. J Bacteriol, 2017. **199**(21).
- 803 76. Edgar, R.C., *MUSCLE: multiple sequence alignment with high accuracy and high throughput*. Nucleic  
804 Acids Research, 2004. **32**(5): p. 1792-1797.
- 805 77. Ravot, G., et al., *Fusibacter paucivorans gen. nov., sp. nov., an anaerobic, thiosulfate-reducing*  
806 *bacterium from an oil-producing well*. Int J Syst Bacteriol, 1999. **49 Pt 3**: p. 1141-7.
- 807 78. Qiu, D., et al., *Fusibacter ferrireducens sp. nov., an anaerobic, Fe(III)- and sulphur-reducing*  
808 *bacterium isolated from mangrove sediment*. Int J Syst Evol Microbiol, 2021. **71**(11).
- 809 79. Ben Hania, W., et al., *Fusibacter tunisiensis sp nov., isolated from an anaerobic reactor used to treat*  
810 *olive-mill wastewater*. International Journal of Systematic and Evolutionary Microbiology, 2012. **62**:  
811 p. 1365-1368.
- 812 80. Fadhlaoui, K., et al., *Fusibacter fontis sp. nov., a sulfur-reducing, anaerobic bacterium isolated from*  
813 *a mesothermic Tunisian spring*. International Journal of Systematic and Evolutionary Microbiology,  
814 2015. **65**(10): p. 3501-3506.
- 815 81. Smii, L., et al., *Fusibacter bizertensis sp nov., isolated from a corroded kerosene storage tank*.  
816 International Journal of Systematic and Evolutionary Microbiology, 2015. **65**: p. 117-121.
- 817 82. Lubner, C.E., et al., *Mechanistic insights into energy conservation by flavin-based electron*  
818 *bifurcation*. Nature Chemical Biology, 2017. **13**(6): p. 655-+.
- 819 83. Gutiérrez-Preciado, A., et al., *Functional shifts in microbial mats recapitulate early Earth metabolic*  
820 *transitions*. Nature Ecology & Evolution, 2018. **2**(11): p. 1700-1708.
- 821 84. Konstantinidis, K.T. and J.M. Tiedje, *Prokaryotic taxonomy and phylogeny in the genomic era:*  
822 *advancements and challenges ahead*. Curr Opin Microbiol, 2007. **10**(5): p. 504-9.
- 823 85. Murphy, J.N. and C.W. Saltikov, *The cymA gene, encoding a tetraheme c-type cytochrome, is*  
824 *required for arsenate respiration in Shewanella species*. J Bacteriol, 2007. **189**(6): p. 2283-90.
- 825 86. Cleiss-Arnold, J., et al., *Temporal transcriptomic response during arsenic stress in Herminiimonas*  
826 *arsenicoxydans*. BMC Genomics, 2010. **11**(1).
- 827 87. Boileau, C., et al., *Hydrogen production by the hyperthermophilic bacterium Thermotoga maritima*  
828 *part I: effects of sulfured nutrients, with thiosulfate as model, on hydrogen production and*  
829 *growth*. Biotechnol Biofuels, 2016. **9**: p. 269.
- 830 88. Detman, A., et al., *Cell factories converting lactate and acetate to butyrate: Clostridium butyricum*  
831 *and microbial communities from dark fermentation bioreactors*. Microbial Cell Factories, 2019. **18**.
- 832 89. Li, F., et al., *Coupled ferredoxin and crotonyl coenzyme A (CoA) reduction with NADH catalyzed by*  
833 *the butyryl-CoA dehydrogenase/Etf complex from Clostridium kluyveri*. J Bacteriol, 2008. **190**(3): p.  
834 843-50.
- 835 90. Westphal, L., et al., *The Rnf Complex Is an Energy-Coupled Transhydrogenase Essential To Reversibly*  
836 *Link Cellular NADH and Ferredoxin Pools in the Acetogen Acetobacterium woodii*. J Bacteriol, 2018.  
837 **200**(21).
- 838 91. Kurth, D., et al., *Arsenic metabolism in high altitude modern stromatolites revealed by metagenomic*  
839 *analysis*. Scientific Reports, 2017. **7**: p. 1024.
